# P granules protect RNA interference genes from silencing by piRNAs

John Paul T. Ouyang<sup>1</sup>, Andrew Folkmann<sup>1</sup>, Lauren Bernard<sup>1</sup>, Chih-Yung Lee<sup>1</sup>, Uri Seroussi<sup>2</sup>, Amanda G. Charlesworth<sup>2</sup>, Julie M. Claycomb<sup>2</sup> and Geraldine Seydoux<sup>1</sup>.

1. HHMI and Dept. of Molecular Biology and Genetics, Johns Hopkins University School of Medicine, Baltimore MD USA

2. Department of Molecular Genetics, University of Toronto, Toronto, Canada.

Corresponding author: [gseydoux@jhmi.edu](mailto:gseydoux@jhmi.edu)

Key Words: RNA-mediated interference, epigenetic silencing, Argonautes, P granules, piRNAs.

## SUMMARY

P granules are perinuclear condensates in *C. elegans* germ cells proposed to serve as hubs for self/non-self RNA discrimination by Argonautes. We report that a mutant (*meg-3 meg-4*) that does not assemble P granules in primordial germ cells loses competence for RNA-interference over several generations and accumulates silencing small RNAs against hundreds of endogenous genes, including the RNA-interference genes *rde-11* and *sid-1*. In wild-type, *rde-11* and *sid-1* transcripts are heavily targeted by piRNAs, accumulate in P granules, but maintain expression. In the primordial germ cells of *meg-3 meg-4* mutants, *rde-11* and *sid-1* transcripts disperse in the cytoplasm with the small RNA biogenesis machinery, become hyper-targeted by secondary sRNAs, and are eventually silenced. Silencing requires the PIWI-class Argonaute PRG-1 and the nuclear Argonaute HRDE-1 that maintains trans-generational silencing of piRNA targets. These observations support a “safe harbor” model for P granules in protecting germline transcripts from piRNA-initiated silencing.

## Introduction

In the germ cells of animals, dense RNA-protein condensates accumulate on the cytoplasmic face of the nuclear envelope. These condensates, collectively referred to as nuage, contain components of the small RNA (sRNA) machinery that scan germline transcripts for foreign sequences. For example, in *Drosophila*, components of the piRNA machinery in nuage amplify small RNAs that target transcripts from transposable elements for destruction (Huang et al., 2017). In *C. elegans*, the PIWI-class Argonaute PRG-1 associates with ~15,000 piRNAs encoded in the genome that scan most, if not all, germline

35 mRNAs (Zhang et al., 2018; Shen et al., 2018). PRG-1 accumulates in nuage condensates called P  
36 granules that overlay nuclear pores (Batista et al., 2008; Wang and Reinke, 2008). Targeting by PRG-  
37 1/piRNA complexes recruits RNA-dependent RNA polymerases that synthesize 22 nucleotide RNAs (22G-  
38 RNAs) complementary to the targeted transcript (Lee et al., 2012; Shen et al., 2018). Synthesis of 22G-  
39 RNAs requires proteins in two other nuage condensates: Z granules (ZNF1-1) and mutator foci (MUT-16)  
40 that form adjacent to P granules (Ishidate et al., 2018; Wan et al., 2018; Phillips et al., 2012; Zhang et al.,  
41 2012). 22G-RNAs in turn are bound by other Argonautes that silence gene expression, including HRDE-1,  
42 a nuclear Argonaute that generates a heritable chromatin mark that silences targeted loci for several  
43 generations (Buckley et al., 2012). Silencing by exogenous triggers, such as dsRNAs introduced by  
44 injection or feeding (exogenous RNAi), also requires 22G-RNA synthesis (Pak and Fire, 2007; Sijen et al.,  
45 2007) and HRDE-1 activity, which propagates the RNAi-induced silenced state over generations (Buckley  
46 et al., 2012).

47 The observation that PRG-1/piRNA complexes engage most germline transcripts suggests the  
48 existence of mechanisms that restrain PRG-1/HRDE-1 silencing activity (Zhang et al., 2018; Shen et al.,  
49 2018). One mechanism involves protection by CSR-1, an opposing Argonaute also present in P granules.  
50 CSR-1 binds to abundant 22G-RNAs that target many germline-expressed mRNAs (Seth et al., 2013;  
51 Wedeles et al., 2013). CSR-1 opposes the engagement of PRG-1/piRNA complexes (Shen et al., 2018) and  
52 is thought to license genes for germline expression (Wedeles et al., 2013; Seth et al., 2013; Cecere et al.,  
53 2014; Shen et al., 2018), although some genes are also modestly silenced by CSR-1 (Gerson-Gurwitz et  
54 al., 2016). The mechanisms that determine the balance of licensing and silencing 22G-RNAs for each  
55 germline-expressed locus are not understood. Inheritance of piRNAs and 22G-RNAs from previous  
56 generations is likely to play a role: progeny that inherit neither piRNAs nor 22G-RNAs from their parents  
57 and that are competent to synthesize their own 22G-RNAs silence germline genes and become sterile  
58 (Phillips et al., 2015; de Albuquerque 2015). P granules could mediate the inheritance of maternal  
59 piRNAs and/or 22G-RNAs since P granules contain Argonaute proteins and are maternally inherited (Fig.  
60 1). Segregation of Argonautes and proteins required for 22G-RNA production into distinct nuage  
61 compartments (P granules versus Z granules and mutator foci) could also play a role in sorting 22G-RNAs  
62 or limiting their production (Wan et al., 2018). A direct test of these hypotheses, however, has been  
63 difficult to obtain as complete loss of P granules causes sterility.

64 We previously identified a mutant that affects P granule coalescence only during embryogenesis  
65 (Wang et al., 2014). MEG-3 and MEG-4 are intrinsically-disordered proteins present in the germ plasm, a  
66 specialized cytoplasm that is partitioned with the germ lineage during early embryonic cleavages (Wang

67 and Seydoux, 2013). MEG-3 and MEG-4 form gel-like scaffolds that recruit and stimulate the coalescence  
68 of P granule proteins in germ plasm to ensure their partitioning to the embryonic germline and the  
69 primordial germ cells Z2 and Z3 (Fig. 1; Putnam et al., 2019). In *meg-3 meg-4* embryos, P granules do not  
70 coalesce in germ plasm, causing granule components to be partitioned equally to all cells and turned  
71 over (Fig. 1; Wang et al., 2014). Despite lacking P granules during embryogenesis, *meg-3 meg-4*  
72 assemble P granules *de novo* when the primordial germ cells resume divisions in the first larval stage to  
73 generate the ~ 2000 germ cells that constitute the adult germline. Unlike other P granule mutants, *meg-*  
74 *3 meg-4* mutants are mostly fertile and can be maintained indefinitely (Wang et al., 2014).

75 In this study, we have examined *meg-3 meg-4* mutants for defects in small RNA (sRNA)  
76 homeostasis. We find that *meg-3 meg-4* mutants become progressively deficient in exogenous RNA-  
77 mediated interference over several generations and accumulate abnormally high levels of sRNAs that  
78 silence endogenous genes. The silenced genes belong to a class of genes that in wild-type are targeted  
79 primarily by the silencing Argonautes PRG-1 and HRDE-1, and include *rde-11* and *sid-1*, two genes  
80 required for exogenous RNAi. *rde-11* and *sid-1* transcripts are retained in P granules in wild-type, but in  
81 *meg-3 meg-4* mutants, the transcripts become dispersed in the cytoplasm with Z granules and mutator  
82 foci components. Our findings suggest a role for P granules in protecting certain germline transcripts  
83 from run-away, trans-generational silencing initiated by piRNAs and amplified by HRDE-1-associated  
84 22Gs.

85

## 86 Results

### 87 *meg-3 meg-4* mutants are defective in exogenous RNA-mediated interference

88 JH3475 is a strain in which both the *meg-3* and *meg-4* open reading frames have been deleted  
89 by genome editing (Smith et al., 2016; Paix et al., 2017). This strain (*meg-3 meg-4*<sup>#1</sup>) has been passaged  
90 over 100 times. In the course of conducting experiments with *meg-3 meg-4*<sup>#1</sup> worms, we noticed that  
91 *meg-3 meg-4*<sup>#1</sup> adults appeared resistant to exogenous RNA-mediated interference. To examine this  
92 phenotype systematically, we fed *meg-3 meg-4*<sup>#1</sup> hermaphrodites bacteria expressing double-stranded  
93 RNA (dsRNA) against the *pos-1* gene. *pos-1* is a maternally-expressed gene required for embryonic  
94 viability (Tabara et al., 1999). As expected, wild-type control hermaphrodites laid on average only 6.5%  
95 viable embryos after *pos-1(RNAi)* (Fig. 2A). In contrast, *meg-3 meg-4*<sup>#1</sup> laid on average 76% viable  
96 embryos after *pos-1(RNAi)* (Fig. 2A). We obtained similar results by administering the double-stranded  
97 RNA by injection, and by targeting two other maternally-expressed genes required for embryogenesis

98 (*mex-5* and *mex-6*) (Fig. 2A and S1A). Abnormal RNAi behavior of strains with loss of function mutations  
99 in *meg-3* and *meg-4* has also been reported by others (Wan et al., 2018; Lev et al., 2019).

100 *meg-3* and *meg-4* are required maternally for the formation of P granules in embryos (Wang et  
101 al., 2014). To determine whether *meg-3* and *meg-4* were also required maternally for RNAi competence,  
102 we tested *meg-3 meg-4* homozygous hermaphrodites derived from heterozygous *meg-3 meg-4*<sup>#1/++</sup>  
103 mothers (M1Z0) and *meg-3 meg-4*<sup>#1/++</sup> heterozygous hermaphrodites derived from homozygous  
104 mutant mothers (MOZ1) (see Fig. S1B for crosses). We found that M1Z0 hermaphrodites had normal  
105 sensitivity to RNAi, whereas MOZ1 hermaphrodites were defective, consistent with a maternal  
106 requirement for *meg-3 meg-4* (Fig. 2A). To test this further, using genome editing (Paix et al., 2017), we  
107 regenerated the *meg-4* deletion in a line carrying the *meg-3* deletion to generate three new *meg-3 meg-*  
108 *4* lines (*meg-3 meg-4*<sup>#2</sup>, *meg-3 meg-4*<sup>#3</sup>, and *meg-3 meg-4*<sup>#4</sup>). Strikingly, we found that the newly  
109 generated *meg-3 meg-4* lines remained competent for RNAi for at least five generations before  
110 beginning to exhibit resistance. After generation six, the degree of RNAi resistance varied from  
111 generation to generation and between strains (Fig. 2B). In contrast, three sibling strains that only  
112 contained the *meg-3* deletion remained sensitive to RNAi throughout the course of the experiment (Fig.  
113 S1C). We conclude that *meg-3 meg-4* mutants exhibit a defect in RNAi that is acquired progressively  
114 over several generations.

115

#### 116 ***meg-3 meg-4* mutants exhibit reduced accumulation of secondary siRNAs triggered by *pos-1*(RNAi)**

117 Silencing of gene activity after ingestion of a long double-stranded RNA trigger requires  
118 production of primary sRNAs derived from the trigger, and synthesis of secondary sRNAs templated  
119 from the targeted RNA (Yigit et al., 2006; Pak and Fire, 2007; Sijen et al., 2007). To determine which step  
120 is affected in *meg-3 meg-4* mutants, we sequenced sRNAs from wild-type and *meg-3 meg-4*<sup>#1</sup> adult  
121 hermaphrodites fed bacteria expressing *pos-1* dsRNA. As an additional control, we also sequenced  
122 sRNAs from *rde-11* hermaphrodites fed *pos-1* RNAi bacteria. *rde-11* mutants generate primary sRNAs  
123 but fail to generate secondary sRNAs and are defective in exogenous RNAi (Yang et al., 2012; Zhang et  
124 al., 2012). Primary and secondary sRNAs can be differentiated by the presence of a 5' monophosphate  
125 on primary sRNAs and a 5' triphosphate on secondary sRNAs (Pak and Fire, 2007; Sijen et al., 2007).  
126 Therefore, for each genotype, we prepared two types of libraries: one where the RNA was left untreated  
127 to preferentially clone primary siRNAs and one where the RNA was treated with a 5' polyphosphatase to  
128 allow the cloning of both primary and secondary sRNAs. As expected, we found that wild-type  
129 hermaphrodites accumulate many sRNAs at the *pos-1* locus that target sequences both within and

130 outside the trigger (Fig. 2C). *rde-11* mutants in contrast accumulate fewer sRNAs at the *pos-1* locus and  
131 all of these target sequences within the trigger region, consistent with normal production of primary  
132 sRNAs and defective production of secondary sRNAs as reported previously (Fig. 2C and Zhang et al.,  
133 2012). Similar to *rde-11*, *meg-3 meg-4* mutants accumulated fewer sRNAs at the *pos-1* locus, and these  
134 sRNAs mapped primarily to the trigger (Fig. 2C). Quantification of primary sRNAs at the *pos-1* locus  
135 revealed similar levels of primary sRNAs in all genotypes (no treatment samples), and reduced overall  
136 levels of sRNAs in *rde-11* and *meg-3 meg-4* compared to wild-type (5' polyphosphatase-treated samples)  
137 (Fig. 2D). We conclude that, like *rde-11* mutants, *meg-3 meg-4* mutants are defective in the production  
138 of secondary sRNAs generated in response to an exogenous RNA trigger.

139

140 ***meg-3 meg-4* mutants have elevated numbers of sRNAs against *rde-11* and five other genes**  
141 **implicated in small RNA pathways.**

142 MEG-3 and MEG-4 proteins are expressed primarily in embryos (Fig. S2A), and so are unlikely to  
143 have a direct role in the production of secondary sRNAs in larval and adult hermaphrodites. The  
144 generational delay in the appearance of the RNAi defective phenotype also suggests an indirect effect.  
145 To understand the origin of the RNAi defect in *meg-3 meg-4* mutants, we sequenced sRNAs in mixed  
146 populations of *meg-3 meg-4*<sup>#1</sup>, *meg-3 meg-4*<sup>#2</sup>, *meg-3 meg-4*<sup>#3</sup>, and *meg-3 meg-4*<sup>#4</sup> under normal  
147 feeding conditions (no exogenous RNAi). We considered three classes of sRNAs: piRNAs and microRNAs,  
148 which are genomically encoded, and sRNAs that are antisense to coding genes. The latter can be sub-  
149 divided further based on published lists of sRNAs immunoprecipitated with specific Argonautes  
150 (Methods). We detected all major classes of sRNAs in *meg-3 meg-4* mutants, including piRNAs,  
151 microRNAs and sRNAs mapping to loci targeted by the Argonautes WAGO-1, WAGO-4, HRDE-1, and CSR-  
152 1 (Fig. S2B; Gu et al., 2009; Xu et al., 2018, Buckley et al., 2012; Claycomb et al., 2009). All classes  
153 accumulated at levels similar to wild-type, with the exception of microRNAs which appeared slightly  
154 elevated in *meg-3 meg-4* mutants (Fig. S2B). We also compared the sRNA length distribution and 5'  
155 nucleotide preference in wild-type and *meg-3 meg-4*<sup>#1</sup> sRNA libraries and found no overt differences  
156 (Fig. S2C-D).

157 We compared the frequency of sRNA reads at every annotated locus in the genome in *meg-3*  
158 *meg-4* mutants versus wild-type. Surprisingly, we identified hundreds of loci with misregulated sRNAs  
159 (Fig. 3A and Fig. S2E-G). Combining data for all four strains, we identified 303 and 316 loci that were  
160 targeted by more or fewer sRNAs, respectively, in all four strains compared to wild-type (Tables S1-S2).  
161 Interestingly, nearly 50% of those loci have been reported to be targeted by sRNAs associated with

162 HRDE-1 in wild-type hermaphrodites (Fig. 3B). HRDE-1-associated sRNAs target 1,208 loci in wild-type,  
163 and 25% (306) of those loci exhibit mis-regulated sRNAs in *meg-3 meg-4* mutants (Fig. 3C). In contrast,  
164 CSR-1-associated sRNAs target over 4,000 transcripts, but only 1.2% (50) of these exhibited  
165 misregulated sRNAs in *meg-3 meg-4* mutants (Fig. 3C). We conclude that *meg-3 meg-4* mutants  
166 misregulate sRNA at many loci that are primarily targeted by the silencing Argonaute HRDE-1.

167 We reasoned that upregulation of silencing sRNAs against loci required for RNAi could explain  
168 the RNAi defective phenotype of *meg-3 meg-4* mutants. To investigate this possibility, we cross-  
169 referenced the 303 genes with upregulated sRNAs with a list of 332 genes implicated in small RNA  
170 pathways compiled from the “gene silencing by RNA” Gene Ontology classification of WormBase WS270,  
171 Kim et al., 2005, and Tabach et al., 2013 (Table S3). This analysis identified 6 genes: *rde-11*, *sid-1*, *hda-3*,  
172 *zfp-1*, *set-23* and *wago-2*. *rde-11* codes for a RING finger domain protein required for exogenous RNAi as  
173 described above (Yang et al., 2012; Zhang et al., 2012). *sid-1* codes for a dsRNA transporter required for  
174 exogenous RNAi by feeding (Winston et al., 2002; Feinberg and Hunter 2003; Minkina and Hunter,  
175 2017). *hda-3* and *zfp-1* are chromatin factors identified in a screen for genes required for exogenous  
176 RNAi (Kim et al., 2005). *set-23* is a predicted histone methyltransferase identified in a screen for genes  
177 that co-evolved with known RNAi factors (Tabach et al., 2013). *wago-2* is a member of the 27  
178 Argonautes present in the *C. elegans* genome (Yigit et al., 2006) and a predicted pseudogene  
179 (WormBase WS270). sRNAs against the six genes were elevated in all four strains, but the extent of  
180 upregulation varied from strain to strain and gene to gene, with *rde-11* and *sid-1* showing the highest  
181 increase in three and one of the four strains, respectively (Fig. 3D). We reasoned that elevated sRNAs  
182 might result in downregulation of the corresponding mRNA transcript. For those analyses, we used *meg-*  
183 *3 meg-4*<sup>#1</sup>, the oldest *meg-3 meg-4* strain with a strong RNAi-resistant phenotype. We found that  
184 expression of the six genes appeared reduced in *meg-3 meg-4*<sup>#1</sup> compared to wild-type as determined  
185 by RNAseq (Fig. 3D – the difference for *zfp-1* did not score as statistically significant). The RNAseq data,  
186 however, must be interpreted cautiously since RNAseq was performed on populations of adult worms,  
187 which in the case of *meg-3 meg-4*<sup>#1</sup> include ~ 30% worms lacking a germline (Wang et al., 2014), but see  
188 below for a more direct measurement of *rde-11* transcript levels. Together, these observations suggest  
189 that the RNAi defect of *meg-3 meg-4* mutants is caused by increased targeting by sRNAs (and likely  
190 lower mRNA expression) of 4 genes with a demonstrated requirement in exogenous RNAi (*rde-11*, *sid-1*,  
191 *hda-3*, and *zfp-1*) and two genes (*set-23* and *wago-2*) with potential roles in sRNA pathways.

192 We also cross-referenced the sRNAs downregulated in *meg-3 meg-4* with sRNA pathway genes  
193 and identified only one gene (*haf-4*). Expression of this gene did not change significantly in *meg-3 meg-4*

194 <sup>#1</sup>. We noticed, however, that 34% of loci with downregulated sRNAs in *meg-3 meg-4* mutants also  
195 exhibited downregulated sRNAs in *rde-11* mutants (Fig. 3E). This observation suggests that  
196 downregulation of some sRNAs in *meg-3 meg-4* mutants may be an indirect consequence of reduced  
197 *rde-11* activity.

198

### 199 **The nuclear Argonaute *hrde-1* is required for upregulation of sRNAs at the *rde-11* and *sid-1* loci in** 200 ***meg-3 meg-4* mutants**

201        Nearly 50% of the genes with misregulated sRNAs in *meg-3 meg-4* mutants (306 of 619 genes)  
202 are targeted by HRDE-1-associated sRNAs in wild-type (Fig. 3B). HRDE-1 is a nuclear Argonaute that  
203 recruits the nuclear RNAi machinery to nascent transcripts. Interestingly, we noticed that the  
204 distribution of sRNAs mapping to the *rde-11* locus in *meg-3 meg-4* mutants is consistent with silencing  
205 by the nuclear RNAi machinery. *rde-11* is transcribed as part of an operon that includes *B0564.2*, a gene  
206 immediately 3' of *rde-11*. Operons are transcribed as single, long transcripts that are broken up into  
207 shorter transcripts by trans-splicing in the nucleus before transport to the cytoplasm (Blumenthal and  
208 Gleason, 2003). In wild-type, only exons three and four of *rde-11* were targeted by sRNAs, with fewer  
209 sRNA mapping to the other exons of *rde-11* or to *B0564.2*. In contrast, in *meg-3 meg-4* mutants, all  
210 exons of both genes were heavily targeted by sRNAs (Fig. 4A and Fig. S3A). As observed for *rde-11*,  
211 *B0564.2* mRNA levels were also significantly downregulated in *meg-3 meg-4* <sup>#1</sup> as determined by RNAseq  
212 (Fig. S3A). The observation that *rde-11* and *B0564.2* are co-targeted by small RNAs in *meg-3 meg-4*  
213 mutants is consistent with targeting by a nuclear Argonaute (Guang et al., 2008).

214        We reasoned that if HRDE-1 were required for silencing the *rde-11* operon, a loss of function  
215 mutation in *hrde-1* should block sRNA amplification against the *rde-11* and *B0564.2* loci and restore  
216 transcripts levels back to wild-type. To test this, we crossed *meg-3 meg-4* hermaphrodites with males  
217 carrying a mutation in *hrde-1* to generate the triple mutant *hrde-1; meg-3 meg-4* (see Fig. S3B for  
218 crosses). Consistent with our hypothesis, we observed lower levels of sRNAs against the *rde-11* and  
219 *B0564.2* transcripts in *hrde-1; meg-3 meg-4* compared to *meg-3 meg-4* (Fig. 4A). sRNAs against *sid-1*,  
220 were also significantly reduced (Fig. S3C), whereas sRNAs against the other sRNA pathway genes (*wago-*  
221 *2*, *hda-3*, *set-23*, and *zfp-1*) did not show changes that reached statistical significance (Fig. S3C). Of the  
222 303 transcripts with upregulated sRNAs in *meg-3 meg-4* mutants, only 39 were partially rescued  
223 (lowered) in *hrde-1; meg-3 meg-4* (Table S4). Although this analysis is likely to be complicated by sRNA  
224 defects inherent to loss of *hrde-1* activity, we conclude that *hrde-1* is responsible for some, but not all,

225 of the upregulation of sRNAs in *meg-3 meg-4* mutants. Other Argonautes that overlap in function with  
226 HRDE-1 may be responsible for the remainder (Shirayama et al., 2012; Gu et al., 2009).

227

### 228 ***rde-11* and *sid-1* are engaged by PRG-1-piRNA complexes and not by CSR-1-sRNA complexes**

229 HRDE-1 has been shown to act downstream of the piRNA Argonaute PRG-1 to perpetuate a  
230 sRNA epigenetic memory (Ashe et al., 2012; Shirayama et al., 2012). Using previously published Cross  
231 Linking and Selection of Hybrids (CLASH) data (Shen et al., 2018), we assigned a rank to each protein  
232 coding gene based on degree of targeting by PRG-1/piRNA complexes. We found that *rde-11* and *sid-1*  
233 rank among the top 50 genes in the genome most targeted by PRG-1/piRNAs complexes (average rank  
234 among coding genes across two CLASH replicates: #15 for *rde-11*, #33 for *sid-1*). 123 unique piRNA sites  
235 were identified in the *rde-11* transcript and 75 in the *sid-1* transcript (Shen et al., 2018). Consistent with  
236 targeting by piRNAs, sRNAs targeting *rde-11* and *sid-1* were reduced in *prg-1* mutants as compared to  
237 wild-type whereas *rde-11* and *sid-1* mRNA levels were increased in *prg-1* mutants (Lee et al., 2012; Shen  
238 et al., 2018; McMurchy et al., 2017, Fig. S3D-E). Silencing of endogenous genes by PRG-1 is countered  
239 by the Argonaute CSR-1, which licenses germline genes for expression (Wedeles et al., 2013; Seth et al.,  
240 2013; Cecere et al., 2014; Shen et al., 2018). Interestingly, a published list of sRNAs that co-  
241 immunoprecipitate with CSR-1 did not contain sRNAs against *rde-11* or *sid-1* (Claycomb et al., 2009). In  
242 fact, as noted above, more than 90% of loci with misregulated sRNAs in *meg-3 meg-4* mutants do not  
243 appear to be targeted by CSR-1-associated sRNAs (Fig. 3B). These observations suggest that  
244 misregulated genes in *meg-3 meg-4* mutants may be in a “sensitized” state in wild-type: hyper-targeted  
245 by silencing PRG-1/piRNA complexes and hypo-targeted by protective CSR-1/sRNA complexes.

246

### 247 **PRG-1 and HRDE-1 are required for *rde-11* silencing and for the RNAi-defective phenotype of *meg-3* 248 *meg-4* mutants**

249 We reasoned that if PRG-1 and HRDE-1 are responsible for the hyper-targeting of loci required  
250 for exogenous RNAi in *meg-3 meg-4* mutants, loss of function mutations in *prg-1* and *hrde-1* should  
251 restore competence for exogenous RNAi to *meg-3 meg-4* mutants. As predicted, we found that, unlike  
252 *meg-3 meg-4* mutants, *hrde-1; meg-3 meg-4* and *prg-1; meg-3 meg-4* mutants were competent for RNAi  
253 (Fig. 4B; see Fig. S3F for cross). In contrast, mutations in a different Argonaute WAGO-4 did not suppress  
254 the *meg-3 meg-4* phenotype (Fig. 4B; see Fig. S3F for cross). CSR-1 mutants are sterile and so could not  
255 be tested in this assay (Yigit et al., 2006; Claycomb et al., 2009). ZNFX-1 is a conserved helicase required  
256 for sRNA amplification (Ishidate et al., 2018; Wan et al., 2018). We found that *znfx-1; meg-3 meg-4*



257 worms were competent for RNAi, suggesting that ZNFX-1, like PRG-1 and HRDE-1, is required for  
258 hypertargeting of RNAi loci in *meg-3 meg-4* mutants (Fig 4B; see Fig. S3F for cross).

259 To examine whether *rde-11* expression is restored in *meg-3 meg-4* mutants that also lack *prg-1*  
260 or *hrde-1*, we used single-molecule fluorescent *in situ* hybridization to directly measure *rde-11* transcript  
261 levels in adult germlines. We focused on *rde-11* since that locus showed the greatest reduction in mRNA  
262 level in a population of *meg-3 meg-4*<sup>#1</sup> adults (Fig. 3B). We found that, as expected, *rde-11* is expressed  
263 robustly in wild-type germlines and at much lower levels in *meg-3 meg-4*<sup>#1</sup> germlines (Fig. 4C and Fig.  
264 S3G). Remarkably, wild-type levels of *rde-11* transcripts were restored in *hrde-1; meg-3 meg-4* and *prg-*  
265 *1; meg-3 meg-4* germlines (Fig. 4C and Fig. S3G). We conclude that PRG-1 and HRDE-1 are required for  
266 silencing of the *rde-11* locus in *meg-3 meg-4* adult germlines.

267

### 268 **P granule proteins, including PRG-1, fail to coalesce into granules in *meg-3 meg-4* embryos**

269 Previous studies using the P granule marker PGL-1 showed that P granules assemble normally  
270 post-embryogenesis in *meg-3 meg-4* germlines (Wang et al., 2014). We verified this observation and  
271 confirmed that formation of Z granules and mutator foci was also unaffected in adult *meg-3 meg-4*  
272 germlines (Fig. S4A-B, Wan et al., 2018). Additionally, PRG-1 and CSR-1 protein levels appeared  
273 unchanged in *meg-3 meg-4* adults compared to wild-type as determined by western analyses (Fig. S4C).  
274 Silencing of the *rde-11* locus in adult germlines, therefore, is unlikely to be due to gross defects in nuage  
275 organization at this stage.

276 During the oocyte-to-embryo transition, the canonical P granule component PGL-1 relocalizes  
277 from the nuclear periphery to cytoplasmic granules that are asymmetrically partitioned to the  
278 embryonic germ lineage during the first embryonic cleavages (Strome and Wood, 1982). Whether other  
279 nuage components behave similarly has not yet been reported systematically. Using fluorescently-  
280 tagged alleles generated by genome editing, we compared the distribution of PRG-1, CSR-1, ZNFX-1, and  
281 MUT-16 to that of PGL-1 (Fig. 5A; Methods, Shen et al., 2018, Wan et al., 2018). We found that like PGL-  
282 1, PRG-1 and ZNFX-1 localize to granules that segregate preferentially with the germ lineage during early  
283 cleavages (also see Wan et al., 2018). CSR-1 exhibited a similar pattern, except that CSR-1 granules did  
284 not appear as strongly asymmetrically segregated (Fig 5A). Around the 28-cell stage, PGL-1 becomes  
285 concentrated in autophagic bodies in somatic cells and is turned over (Zhang et al., 2009). We observed  
286 a similar pattern of turnover for PRG-1, CSR-1 and ZNFX-1 in somatic lineages. By comma-stage, PGL-1,  
287 PRG-1, CSR-1 and ZNFX-1 could only be detected in the primordial germ cells Z2 and Z3 (Fig. 5A).

288 In *meg-3 meg-4* embryos, PGL-1, PRG-1, CSR-1 and ZNFX-1 granules were segregated evenly to  
289 all cells and turned over in somatic cells after the 28-cell stage (Fig. 5B). Consistent with failed  
290 preferential segregation to the germ lineage, by mid-embryogenesis (comma-stage), PGL-1, PRG-1, and  
291 ZNFX-1 levels were severely reduced in *meg-3 meg-4* compared to wild-type (Fig. 5B). In contrast, CSR-1  
292 levels appear comparable to wild-type. At this stage, in wild-type, PGL-1, PRG-1, ZNFX-1 and CSR-1 are  
293 concentrated in granules around the nuclei of Z2 and Z3 (Fig. 5A). In contrast, in *meg-3 meg-4* mutants,  
294 these proteins were mostly cytoplasmic in Z2 and Z3 forming only rare puncta, with the exception of  
295 PGL-1 which formed many small cytoplasmic puncta (Fig. 5B).

296 Unlike P granule-associated proteins, the mutator foci protein MUT-16 was segregated  
297 uniformly to all cells of early wild-type embryos, and remained as an abundant cytoplasmic protein in  
298 most cells throughout embryogenesis. Bright perinuclear MUT-16 puncta could be observed in many  
299 cells, including Z2 and Z3. This pattern was not disrupted significantly in *meg-3 meg-4* mutants (Fig. 5B).

300 Finally, we also examined the embryonic distribution of HRDE-1, using a GFP-tagged allele  
301 (Methods). HRDE-1 was present in all cells in early embryos and became restricted to the germline  
302 founder cell P<sub>4</sub> by the 28-cell stage by an unknown mechanism. This pattern was not disrupted in *meg-3*  
303 *meg-4* embryos. In comma-stage embryos, HRDE-1 was present exclusively in Z2 and Z3 in both wild-  
304 type and *meg-3 meg-4* mutants (Fig. 5A-B). The only observed difference was that the nuclear-to-  
305 cytoplasm ratio of HRDE-1 was higher in *meg-3 meg-4* primordial germ cells compared to wild-type (Fig.  
306 5A-B and S4G-H). No such difference was seen when comparing HRDE-1 in oocytes of *meg-3 meg-4* and  
307 wild-type hermaphrodites (Fig. S4G-H). Intriguingly, increased nuclear-to-cytoplasm ratio has been  
308 correlated with 22G-RNA loading for the somatic nuclear Argonaute, NRDE-3 (Guang et al., 2008).

309 In summary, we find that primordial germ cells in *meg-3 meg-4* mutants maintain mutator foci  
310 and nuclear HRDE-1, but fail to assemble perinuclear P and Z granules. P (PRG-1, CSR-1, PGL-1) and Z  
311 (ZNFX-1) granule proteins are still present in these cells, but are dispersed throughout the cytoplasm.

312

### 313 ***rde-11* and *sid-1* transcripts are transcribed and accumulate in P granules in wild-type, but not *meg-3*** 314 ***meg-4* primordial germ cells**

315 The dramatic nuage assembly defect in *meg-3 meg-4* embryos led us to investigate whether *rde-*  
316 *11* and *sid-1* might be expressed in Z2 and Z3 during embryogenesis. We performed fluorescent *in situ*  
317 hybridization for *rde-11* and *sid-1* on wild-type embryos expressing GFP::PRG-1. Consistent with  
318 expression in the adult maternal germline, we detected cytoplasmic *rde-11* and *sid-1* transcripts in early  
319 embryos (Fig. S5). In comma-stage embryos, we observed scattered single *sid-1* and *rde-11* transcripts in

320 somatic cells and clusters of *rde-11* and *sid-1* transcripts in Z2 and Z3 (Fig. S5). The clusters overlapped  
321 with perinuclear granules positive for GFP::PRG-1 (Fig. 6A). We also detected a few transcripts in the  
322 cytoplasm away from GFP::PRG-1 granules, but these were a minority (Fig. 6B). Consistent with zygotic  
323 transcription at this stage, we detected nuclear signal in 9 of 14 comma-stage embryos examined for  
324 *rde-11* expression and 4 of 5 comma-stage embryos examined for *sid-1* expression. These observations  
325 suggest that *rde-11* and *sid-1* are transcribed in Z2 and Z3 during embryogenesis and accumulate in P  
326 granules with PRG-1.

327         Next, we examined *rde-11* and *sid-1* transcripts in *gfp::prg-1; meg-3 meg-4* embryos. *meg-3*  
328 *meg-4* primordial germ cells accumulated fewer *rde-11* and *sid-1* transcripts compared to wild-type (Fig.  
329 6A, C). We detected nuclear transcripts in 3 of 8 embryos examined for *rde-11* expression and 3 of 8  
330 embryos examined for *sid-1* expression. Consistent with the fact that PRG-1 forms fewer and smaller  
331 granules in *meg-3 meg-4* mutants, a smaller proportion of cytoplasmic *rde-11* and *sid-1* transcripts were  
332 enriched in granules compared to wild-type and most transcripts were dispersed in the cytoplasm (Fig.  
333 6A and B). We conclude that *rde-11* and *sid-1* loci are also transcribed in *meg-3 meg-4* primordial germ  
334 cells, albeit at a potentially lower efficiency compared to wild-type. *rde-11* and *sid-1* transcripts  
335 accumulate with PRG-1 in P granules in wild-type primordial germ cells, but not in *meg-3 meg-4* where  
336 they disperse with PRG-1 in the cytoplasm.

337

## 338 **DISCUSSION**

339         In this study, we take advantage of a mutant deficient in nuage coalescence during  
340 embryogenesis to examine the function of nuage compartments in regulating endogenous gene  
341 expression. We find that *meg-3 meg-4* mutants become RNAi-deficient over several generations and  
342 that this phenotype requires PRG-1 and HRDE-1 activities. *meg-3 meg-4* mutants upregulate sRNAs  
343 against ~300 loci, including four genes required for exogenous RNAi (*rde-11*, *sid-1*, *hda-3*, *zfp-1*) and two  
344 genes implicated in sRNA pathways (*wago-2* and *set-23*). The genes with upregulated sRNAs in *meg-3*  
345 *meg-4* mutants belong to a unique class of loci that are targeted by PRG-1-piRNA and HRDE-1-sRNA  
346 complexes, and not targeted by CSR-1-sRNA complexes. *rde-11* and *sid-1* transcripts are expressed in  
347 primordial germ cells where they accumulate in perinuclear P granules in wild-type, but not in *meg-3*  
348 *meg-4* mutants where the transcripts scatter in the cytoplasm mixing with other dispersed nuage  
349 components. Together, these observations suggest that coalescence of nuage into distinct condensates  
350 restrains 22G-RNA amplification initiated by piRNAs, especially at loci required for exogenous RNAi.

351

352 **Maternal inheritance of P granules is not essential for inheritance of epigenetic traits**

353 In *Drosophila*, maternally-deposited piRNAs defend progeny against active transposable  
354 elements (Brennecke et al., 2008). Similarly, in *C. elegans*, maternal piRNAs are required to restore  
355 transposon silencing and the proper balance of 22G-RNAs in animals that do not inherit 22G-RNAs from  
356 their parents (Phillips et al., 2015; de Albuquerque 2015). How piRNAs and other sRNAs are transmitted  
357 from germline to germline across generations is not known. In principle, P granules (and their equivalent  
358 in *Drosophila*, the polar granules) are ideal conduits, since P granules concentrate Argonaute proteins  
359 and are actively partitioned to the embryonic germline during early embryonic cleavages. Our  
360 observations with *meg-3 meg-4* mutants, which break the cycle of maternal P granule inheritance,  
361 however, challenge this hypothesis. First, the fact that most germline genes are expressed normally in  
362 *meg-3 meg-4* mutants demonstrates that maternal inheritance of P granules is not essential to license  
363 most germline gene expression. Second, *meg-3 meg-4* become RNAi defective only after several  
364 generations, consistent with transmission of an epigenetic signal that is amplified over generational  
365 time. Finally, the RNAi-defective phenotype of *meg-3 meg-4* mutants is inherited maternally, providing  
366 direct evidence for epigenetic inheritance in the absence of embryonic P granules. We conclude that P  
367 granules are not essential to deliver epigenetic signals to the next generation. This conclusion does not  
368 exclude the possibility that some epigenetic signals may rely on embryonic P granules for maximal  
369 transmission (such as PRG-1/piRNAs complexes, see below).

370 The nuclear Argonaute HRDE-1 is likely to be the conduit for at least part of the epigenetic  
371 inheritance we observe in *meg-3 meg-4* mutants. HRDE-1 is required for the RNA-interference defect of  
372 *meg-3 meg-4* mutants. Nuclear HRDE-1 segregates with the embryonic germ line and this distribution  
373 was not affected in *meg-3 meg-4* mutants. CSR-1 and PRG-1 could also be detected in the cytoplasm of  
374 *meg-3 meg-4* primordial germ cells, despite not being in perinuclear condensates. These observations  
375 suggest that at least some of the maternal pool of Argonautes present in zygotes segregates with the  
376 embryonic germ lineage independent of P granules. In zygotes, the polarity regulators PAR-1 and MEX-5  
377 collaborate to drive asymmetric segregation of germ plasm (a collection of maternally-inherited RNA-  
378 binding proteins) to the germline founder cell P<sub>4</sub> (Schubert et al., 2000; Folkmann and Seydoux, 2019). It  
379 will be important to investigate the mechanisms that segregate HRDE-1 and other Argonautes to the  
380 embryonic germline and ensure transmission of epigenetic signals from one generation to the next.

381

382 **P granules protect *rde-11* and *sid-1* from PRG-1/HRDE-1-driven silencing**

383 Several lines of evidence suggest that the RNAi deficient phenotype of *meg-3 meg-4* is due to  
384 silencing of genes required for exogenous RNAi, in particular *rde-11* and *sid-1*. First, like *rde-11* mutants  
385 (Zhang et al., 2012), *meg-3 meg-4* mutants exhibit both reduced production of secondary sRNAs in  
386 response to an exogenous trigger and reduced levels of endogenous sRNAs at 108 loci also affected  
387 in *rde-11* mutants. Second, like *sid-1* mutants (Wang and Hunter, 2017), *meg-3 meg-4* mutants are  
388 partially resistant not only to dsRNA introduced by feeding but also to dsRNA introduced by  
389 injection. Third, sRNAs mapping to the *rde-11* and *sid-1* loci were elevated in four independent *meg-3*  
390 *meg-4* lines, and both transcripts were reduced in the original *meg-3 meg-4* line. Fourth, loss of *hrde-*  
391 *1* in *meg-3 meg-4* restored both competence for RNAi and *rde-11* transcript levels in adult  
392 gonads. Although silencing of *rde-11* and *sid-1* are likely to be the main drivers of the *meg-3 meg-4*  
393 RNAi-defective phenotype, they may not be the only contributors. sRNAs against two other genes  
394 required for RNAi (*hda-3* and *zfp-1*) and two genes implicated in sRNA pathways (*wago-2* and *set-23*)  
395 were also elevated in *meg-3 meg-4* strains. To what extent silencing of these and other genes  
396 additionally contributes to the *meg-3 meg-4* RNAi-defective phenotype remains to be determined.

397 Of the thousands of genes expressed in germ cells, what makes *rde-11* and *sid-1* so prone to  
398 silencing in *meg-3 meg-4* mutants? Examination of recent transcriptome-wide data for PRG-1/piRNA  
399 engagement on endogenous transcripts revealed that *rde-11* and *sid-1* are among the top 50 most  
400 targeted messages in the entire *C. elegans* transcriptome (Shen et al., 2018). In contrast, *rde-11* and *sid-*  
401 *1* do not appear to be targeted by sRNAs associated with the protective Argonaute CSR-1. This  
402 combination of excessive targeting by PRG-1 and hypo-targeting by CSR-1 may be a contributing factor  
403 for why *rde-11* and *sid-1* are selectively silenced in *meg-3 meg-4* mutants.

404 Another characteristic of *rde-11* and *sid-1* is that they are expressed in primordial germ cells  
405 during embryogenesis. Only three other genes so far have been documented to be transcribed in  
406 primordial germ cells before hatching (Subramaniam and Seydoux, 1999; Kawasaki et al., 1998; Mainpal  
407 et al., 2015), which has been described as a period of low transcriptional activity for the germline  
408 (Schaner et al., 2003). This is also precisely the developmental period during which *meg-3 meg-4*  
409 mutants lack P granules, suggesting that expression in the absence of P granules is what triggers  
410 silencing of *rde-11* and *sid-1* in *meg-3 meg-4* mutants.

411 We propose the following model (Fig. 7). In wild-type, upon emergence from the nucleus, *rde-11*  
412 and *sid-1* transcripts accumulate in P granules where they associate with PRG-1/piRNA complexes.  
413 Transcript retention in P granules limits their use as templates for 22G-RNA synthesis in Z granules and  
414 mutator foci. Consequently, only a moderate number of HRDE-1-associated 22Gs accumulate against

415 *rde-11* and *sid-1* in wild-type, allowing the loci to remain expressed. In contrast, in *meg-3 meg-4*  
416 mutants, *rde-11* and *sid-1* transcripts are released directly in the cytoplasm where they are free to mix  
417 with dispersed nuage components. 22G-RNA synthesis is accelerated, causing HRDE-1 to become hyper-  
418 loaded with sRNAs against *rde-11* and *sid-1*, enter the nucleus and silence the *rde-11* and *sid-1* loci. The  
419 observed increase in HRDE-1 nuclear-to-cytoplasmic ratio in *meg-3 meg-4* primordial germ cells is  
420 suggestive of elevated HRDE-1 nuclear activity.

421 It may appear counterintuitive that *rde-11* and *sid-1* transcripts experience an increase in PRG-1-  
422 driven silencing, given that PRG-1 levels are much lower overall in *meg-3 meg-4* primordial germ cells  
423 compared to wild-type (Fig. 5). In certain genetic contexts, maternal inheritance of PRG-1 has been  
424 shown to *protect* germline mRNAs from silencing by preventing misrouting of 22G-RNAs into silencing  
425 Argonaute complexes (Phillips et al., 2015). One possibility is that targeting by PRG-1/piRNA complexes  
426 in the context of the P granule environment marks transcripts for potential silencing but also protects  
427 them from mutator activity in the cytoplasm by retaining most transcripts in granules. In the absence of  
428 P granules, however, the protective influence of PRG-1/piRNA complexes is lost and transcripts are free  
429 to engage with the sRNA amplification machinery in the cytoplasm. The low levels of PRG-1 in *meg-3*  
430 *meg-4* primordial germ cells may explain why several rounds of cytoplasmic exposure (generations) are  
431 needed before sufficiently high numbers of HRDE-1/sRNA complexes are generated to silence the RNAi  
432 genes.

433

#### 434 **A mechanism for fine tuning the RNA-interference machinery?**

435 piRNAs are genomically-encoded so presumably the heavy targeting of *rde-11* and *sid-1* is  
436 beneficial to *C. elegans*. The ability to mount an RNAi response in *C. elegans* has been reported to be  
437 tunable across generations (Houriz-Ze'evi et al., 2016). Transgenerational duration of an RNAi response  
438 to a primary dsRNA trigger is extended when progeny are exposed to an unrelated second dsRNA  
439 trigger. Furthermore, exposure to dsRNA changes the level of sRNAs that target genes in the RNA-  
440 interference machinery, including *rde-11* and *sid-1* and many others (Houriz-Ze'evi et al., 2016). Small  
441 changes in temperature have also been shown to affect piRNA biogenesis leading to changes in gene  
442 expression in subsequent generations (Belicard et al., 2018). These observations suggest that  
443 environmental influences can modulate the potency and specificity of the sRNA machinery. We suggest  
444 that this modulation is achieved in part by piRNA-targeting and sequestration in P granules of transcripts  
445 coding for epigenetic factors, such as *rde-11* and *sid-1*. An exciting possibility is that P granules modulate  
446 the rate of delivery of piRNA-targeted transcripts to mutator foci as a function of maternal experience

447 and this process begins as soon as transcription initiates in the primordial germ cells. In this way,  
448 embryos could integrate ancestral inputs to fine-tune their own epigenetic machinery before hatching  
449 and taking their first meal.

450

#### 451 **Acknowledgments**

452 We thank the Johns Hopkins Neuroscience Research Multiphoton Imaging Core (NS050274) and  
453 the Johns Hopkins Integrated Imaging Center (S10OD023548) for excellent microscopy support. We  
454 thank the Phillips and Mello labs for strains, the Mello lab for help with analyzing CLASH data, the Miska  
455 lab for guidance with sRNAseq, Anne Dodson and Scott Kennedy for sharing data before publication, and  
456 Charlotte Choi, Anne Dodson, Scott Kennedy, John Kim, Craig Mello, Eric Miska, the Baltimore Worm  
457 Club and the Seydoux lab for many helpful discussions. JPTO thanks Taylor Swift for inspiration. JPTO  
458 was supported by the JHU SOM Biochemistry, Cellular, and Molecular Biology NIH training grant (T32  
459 GM007445). GS is an investigator of the Howard Hughes Institute.

460

#### 461 **Author Contributions**

462 JPTO, AWF, LB conducted the experiments; JPTO, AWF, LB, CYL and GS analyzed the data; US,  
463 AGC, and JMC constructed the GFP::CSR-1 and GFP::HRDE-1 strains, JPTO and GS designed the  
464 experiments and wrote the paper.

465

#### 466 **Figures**

##### 467 **Fig. 1: Segregation of P granules in wild-type and *meg-3 meg-4* embryos**

468 Schematics of *C. elegans* embryos at successive stages of development from the 1-cell zygote to the first  
469 larval stage post hatching. RNA polymerase II activity is repressed in the P lineage until gastrulation  
470 when P<sub>4</sub> divides to generate Z2 and Z3. In wild-type, P granules (green dots) are segregated  
471 preferentially with the germ plasm (lighter green color) to the P lineage that gives rise the primordial  
472 germ cells Z2 and Z3. In *meg-3 meg-4* mutants, P granules are partitioned to all cells and are eventually  
473 dissolved/turned over. Germ plasm, however, segregates normally in *meg-3 meg-4* mutants. Despite  
474 lacking maternal P granules, *meg-3 meg-4* mutants assemble perinuclear P granules *de novo* during late  
475 embryogenesis and into the first larval stage (Wang et al., 2014).

476

477 **Fig. 2: *meg-3 meg-4* mutants lose competency for RNA-interference and are defective in the**  
478 **production of secondary siRNAs.**

479 A. Graph showing the percentage of viable embryos laid by hermaphrodites of the indicated genotypes  
480 upon treatment with *pos-1* dsRNA. First two bars depict the embryonic viability from populations of ~20  
481 hermaphrodites fed starting at the L1 stage (each dot represents an experiment performed on a distinct  
482 population). On average, roughly 200 embryos were scored per RNAi experiment. The following two  
483 bars represent the percent viable progeny of mothers ~16 hours following injection with 200 ng/uL of  
484 *pos-1* dsRNA (each dot represents the progeny of a single injected young adult hermaphrodite that laid  
485 more than 15 embryos). The last three bars represent viable progeny from M2Z2, M1Z0, and M0Z1  
486 hermaphrodites fed starting at the L4 stage (each dot represents the progeny of a single hermaphrodite  
487 that laid more than 15 embryos). The “M” and “Z” designations refer to the number of wild-type *meg-3*  
488 *meg-4* alleles present in the mother (M) or hermaphrodite (Z) tested for RNAi. Bar height represents the  
489 mean; error bars represent the standard deviation. P-values were calculated using an unpaired t-test.

490 B. Graph showing the percentage of viable embryos among broods (~12 mothers) laid by newly  
491 generated *meg-3 meg-4* hermaphrodites fed with bacteria expressing *pos-1* dsRNA (from L4 stage).  
492 Three independently derived strains are shown. “Generation” refers to the number of generations since  
493 the *meg-4* gene was deleted by genome editing in the starting strain carrying only a *meg-3* deletion. See  
494 Fig. S1C for RNAi sensitivity of three sibling strains carrying only the original *meg-3* deletion. See Fig.  
495 S1D for CRISPR breeding scheme.

496 C. Genome browser view of sRNA reads mapping to the *pos-1* locus in adult hermaphrodites of indicated  
497 genotypes fed with bacteria expressing a dsRNA trigger (red in figure) against a central region of the *pos-1*  
498 locus.

499 D. Graphs showing the abundance of sRNA reads mapping to the *pos-1* locus in adult hermaphrodites of  
500 the indicated genotypes fed *pos-1* RNAi. The upper panel shows primary sRNAs (directly derived from  
501 the ingested trigger), the bottom graph shows all sRNAs (both primary and secondary) from  
502 phosphatase treated library samples. Bar height represents the mean; error bars represent the standard  
503 deviation; p-values were calculated using an unpaired t-test.

504

505 **Fig. 3: *meg-3 meg-4* mutants misregulate sRNAs that target hundreds of loci.**

506 A. Scatter plot comparing sRNA abundance in wild-type (X-axis) and *meg-3 meg-4*<sup>#1</sup> (Y-axis)  
507 hermaphrodites. Each dot represents an annotated locus in the *C. elegans* genome. Red dots represent  
508 loci with significantly upregulated or downregulated sRNAs comparing two biological replicates each for  
509 wild-type and *meg-3 meg-4*<sup>#1</sup>.



510 B. Pie chart showing the 619 genes with misregulated sRNAs in *meg-3 meg-4* strains categorized  
511 according to the type of sRNAs that target these genes in wild-type. Note that 49.4% of these sRNAs are  
512 classified as HRDE-1-associated (Buckley et al., 2012).

513 C. Venn diagrams showing the overlap between loci with upregulated or downregulated sRNAs in *meg-3*  
514 *meg-4* mutants and loci targeted by sRNAs that co-immunoprecipitate with HRDE-1 and CSR-1 (Buckley  
515 et al., 2012; Claycomb et al., 2009).

516 D. Bar graph showing the average log<sub>2</sub> fold difference in sRNA abundance for the indicated loci in the  
517 four *meg-3 meg-4* strains compared to wild-type. The log<sub>2</sub> fold change represents the average of two  
518 biological replicates for each genotype. Last grouping shows the mRNA abundance for each gene in the  
519 *meg-3 meg-4*<sup>#1</sup> adults as determined by RNAseq from two biological replicates.

520 E. Venn diagrams showing the overlap between loci with downregulated sRNAs in *meg-3 meg-4* mutants  
521 and loci with downregulated sRNAs in *rde-11* mutants.

522

523 **Fig. 4: *meg-3 meg-4* phenotypes are suppressed by loss-of-function mutations in *hrde-1* and *prg-1***

524 A. Browser view of the *rde-11/B0564.2* locus showing normalized sRNA reads in hermaphrodites of the  
525 indicated genotypes.

526 B. Graph showing the percentage of viable embryos among broods laid by hermaphrodites of the  
527 indicated genotypes and fed bacteria expressing *pos-1* dsRNA from the L1 stage. Each dot represents an  
528 independent RNAi experiment performed with a cohort of 15-20 hermaphrodites allowed to lay eggs for  
529 1-2 hours. On average, over 200 embryos were scored per RNAi experiment. Note for *prg-1; meg-3 meg-*  
530 *4*, values were normalized to the levels of embryonic lethality the strain exhibits under non-RNAi  
531 conditions. Bar height and error bars represent the mean and standard deviation respectively; p-values  
532 were obtained using an unpaired t-test.

533 C. Quantification of smFISH signal normalized to the average wild-type value. Each dot represents a  
534 single gonad. Center bar represents the mean and error bars indicate the standard deviation. P values  
535 were obtained through an unpaired t-test. See Fig S3G for regions quantified.

536

537 **Fig. 5: Localization of epigenetic factors during embryonic development in wild-type and *meg-3 meg-4***  
538 **mutants.**

539 Photomicrographs of (A) wild-type and (B) *meg-3 meg-4* embryos at the indicated developmental stages  
540 expressing fluorescently-tagged nuage proteins and HRDE-1. All tags were introduced at the  
541 endogenous locus by genome editing. Last column shows close-ups of a single primordial germ cell

542 (PGC) at comma-stage. Image acquisition and display values were adjusted for each protein and  
543 therefore levels cannot be compared between proteins. Wild-type and *meg-3 meg-4* panels for each  
544 fusion are comparable, except for panels with asterisks which were adjusted to visualize the much lower  
545 levels of fluorescence in *meg-3 meg-4* mutants. See Fig. S4F for non-adjusted panels. Scale bars are 4  
546  $\mu\text{m}$  (embryo panels) and 2  $\mu\text{m}$  (PGC panels).

547

548 **Fig. 6: Localization of *rde-11* and *sid-1* transcripts in wild-type and *meg-3 meg-4* primordial germ cells.**

549 A. Photomicrographs of primordial germ cells in comma-stage embryos hybridized to fluorescent probes  
550 to visualize *rde-11* and *sid-1* transcripts (yellow). Embryos also express GFP::PRG-1 fusion (green).

551 Arrows point to nuclear transcripts. Stippled lines indicate cell outline. Scale bar is 2  $\mu\text{m}$ .

552 B. Graph showing the % of *rde-11* and *sid-1* transcripts in GFP::PRG-1 granules in wild-type vs *meg-3*  
553 *meg-4* primordial germ cells. Each dot represents one embryo. Error bars represent the standard  
554 deviation. P-values were obtained through an unpaired t-test.

555 C. Graph showing the number of *rde-11* and *sid-1* transcripts in wild-type and *meg-3 meg-4* primordial  
556 germ cells. Each dot represents one embryo. Mid bar represents the mean while error bars indicate the  
557 standard deviation. P-values were obtained through an unpaired t-test. A significant p-value was  
558 obtained between mRNA number in wild-type and *meg-3 meg-4* for *rde-11* mRNA but was not for *sid-1*  
559 mRNA due to a single outlier.

560

561 **Fig. 7: Model illustrating the fate of *rde-11* transcripts in wild-type and *meg-3 meg-4* primordial germ**  
562 **cells.**

563 In wild-type primordial germ cells, *rde-11* transcripts (black) are transcribed by RNA polymerase II (blue),  
564 and accumulate in P granules (green) upon exit from the nucleus. In P granules, *rde-11* transcripts are  
565 targeted by PRG-1/piRNA complexes (green) which slows their release into the cytoplasm. Few  
566 transcripts reach the cytoplasm (yellow) where mutator activity triggers production of secondary sRNAs  
567 (red) that load on HRDE-1 (pink).

568 In *meg-3 meg-4* primordial germ cells, *rde-11* transcripts immediately disperse in the cytoplasm upon  
569 exit from the nucleus. In the cytoplasm, *rde-11* transcripts are targeted by PRG-1/piRNA complexes and  
570 by mutator activity which triggers the production of secondary sRNAs. The secondary sRNAs are loaded  
571 on HRDE-1 stimulating its nuclear accumulation leading to silencing of the *rde-11* locus.

572

573 **STAR Methods:**

574 **Lead Contact and Materials Availability:**

575 Further information and requests for resources and reagents should be directed to Geraldine  
576 Seydoux ([gseydoux@jhmi.edu](mailto:gseydoux@jhmi.edu)). Plasmids generated in this study have been deposited to Addgene.  
577 Strains used in this study have been deposited at the Caenorhabditis Genetics Center (CGC). Unique  
578 reagents generated in this study are listed in the Key Resources Table.

579

580 **Experimental Model and Subject Details:**

581 All *C. elegans* strains used throughout this study were maintained at 20° C on NNGM growth  
582 media or Enriched Peptone media and fed OP50 or NA22 bacteria. Strains used in this study are listed in  
583 the Key Resources Table.

584

585 **Methods Details:**

586 *Strain construction and validation:*

587 CRISPR generated lines were created as in Paix et al., 2017 or Dickinson et al 2015 as indicated in  
588 the Key Resources Table. Guides and repair templates used for CRISPR are listed in Table S5. For functional  
589 validation of the *gfp::hrde-1* and *gfp::csr-1* strains, brood sizes were determined as follows: L4 stage  
590 worms were picked to separate plates and transferred every day until egg laying ceased. The progeny on  
591 each plate were counted 1-2 days after the mother was transferred. Experiments were conducted at 25°  
592 C and 20° C for *gfp::hrde-1* and *gfp::csr-1* respectively (Fig. S4D-E).

593 The following names were used throughout the paper to indicate the following strains:

- 594 • *meg-3 meg-4*<sup>#1</sup> → JH3475
- 595 • *meg-3 meg-4*<sup>#2</sup> → JH3672
- 596 • *meg-3 meg-4*<sup>#3</sup> → JH3673
- 597 • *meg-3 meg-4*<sup>#4</sup> → JH3674

598

599 *RNA interference assays:*

600 The *pos-1* 400 nt L4440 RNAi vector used for sRNA sequencing in Fig 2C, D was made using the  
601 Clontech In-Fusion HD Cloning Kit. The PCR oligos used for cloning are listed in Table S5. The *pos-1*  
602 segment cloned was amplified from the full CDS *pos-1* L4440 plasmid from the Dharmacon *C. elegans*  
603 RNAi collection and cloned into the L4440 vector.

604 All RNAi experiments were performed at 20°C. Feeding RNAi experiments were performed by  
605 placing worms on HT115 bacteria expressing dsRNA as previously described in Timmons and Fire, 1998.  
606 Briefly, HT115 cells were transformed with L4440 RNAi plasmids, and colonies were inoculated into 2  
607 mLs 100 ug/mL ampicillin LB liquid media and grown for five hours at 37° C. Cultures were then induced  
608 with IPTG for a final concentration of 5 mM and grown for 45 minutes. Bacteria were then plated on  
609 NNGM agar containing 100 ug/mL carbenicillin and 1 mM IPTG. Feeding was performed starting at the  
610 L1 or L4 stage (time of feeding is indicated in the figure legends for each experiment). For feeding at the  
611 L1 stage, worms were fed RNAi bacteria for ~72 hours before experimentation. For feeding at the L4  
612 stage, experiments were performed ~36 hours after placement on RNAi.

613 For RNAi by injection, *pos-1* dsRNA was obtained using the T7 RiboMAX Express Large Scale RNA  
614 Production System and purified using Zymo's RNA Clean & Concentrator Kits. Young adults were injected  
615 with 200 ng/uL *pos-1* dsRNA and embryonic lethality was assessed for each injected mother 16 hours  
616 following injection.

617 For embryonic lethality calculations, single mothers or cohorts of 10-20 mothers were allowed  
618 to lay eggs for periods ranging from 1-2 hours. Embryos were then counted, and adults were scored four  
619 days later. *prg-1; meg-3 meg-4* hermaphrodites lay ~50% dead embryos even under non-RNAi  
620 conditions. For those experiments, embryonic lethality on *pos-1* RNAi was normalized to embryonic  
621 lethality on control L4440 RNAi.

622

#### 623 *Western Blots:*

624 For the MEG-3::OLLAS/MEG-4::3X::FLAG western blot, a mixed population of worms was  
625 subjected to bleaching to obtain embryos for L1 synchronization by shaking in M9 (22.0 mM KH<sub>2</sub>PO<sub>4</sub>,  
626 42.3 mM Na<sub>2</sub>HPO<sub>4</sub>, 85.6 mM NaCl, 1 mM MgSO<sub>4</sub>) for 18-20 hours. L1 samples were then taken before  
627 plating on OP50 bacteria. Samples were then collected at different developmental stages. Embryo  
628 samples were collected from the synchronized gravid adult worms. Staged samples were resuspended in  
629 1x PBS/cOmplete Mini, EDTA-free Protease Inhibitor Cocktail. 5.5 uL of dense worm volume was then  
630 combined with 2.5 uL of NuPAGE LDS Sample Buffer and 2 uL of 1 M DTT.

631 For GFP::PRG-1/GFP::CSR-1 western blots, 75-100 fertile adults were collected and placed in 20  
632 uL of 1x PBS/ cOmplete Mini, EDTA-free Protease Inhibitor Cocktail. 9.09 uL of NuPAGE LDS Sample  
633 Buffer and 7.27 of 1 M DTT were added to each sample.

634 For sample preparation, all samples were lysed by four freeze thaw cycles. Following lysis,  
635 samples were heated at 85 C° for 10 minutes and then run on a Bolt 4-12% Bis-Tris Plus Gel in NuPAGE

636 MOPS SDS Running Buffer. Samples were then transferred to an Immobilon-P PVDF Membrane, blocked  
637 in PBS+0.1%Tween20+5% nonfat dry milk and incubated with primary antibodies diluted in  
638 PBS+0.1%Tween20+5% milk. The blot was washed three times in PBS+0.1%Tween20 and visualized by  
639 treatment with HyGLO Quick Spray Chemiluminescent HRP Antibody Detection Reagent and imaging by  
640 the KwikQuant™ Imager. For samples requiring a secondary antibody, the blot was incubated with a  
641 secondary antibody diluted in PBS+0.1%Tween20+5% milk following the three washes after the primary  
642 antibody. The blot was washed thrice more in PBS+0.1%Tween20 and imaged as described above.  
643 Antibody dilutions used were as follows:

- 644 • anti-FLAG M2 mouse IgG1: 1:500 dilution
- 645 • anti-OLLAS L2 rat IgG1 Kappa HRP: 1:1000
- 646 • anti- $\alpha$ -Tubulin mouse IgG1: 1:1000
- 647 • anti-GFP mouse IgG2a: 1:500
- 648 • goat anti-mouse IgG1 HRP: 1:2500
- 649 • goat anti-mouse IgG2a HRP: 2500

650

651 *RNA extraction and high-throughput sequencing library preparation:*

652 Mixed or adult staged (~55-60 hours following L1 synchronization) populations of worms were  
653 collected, and RNA was isolated using the TRIzol reagent and chloroform. RNA was then concentrated  
654 and purified using Zymo's RNA Clean & Concentrator Kits. For sRNA library preparation, RNA was either  
655 treated or untreated with RNA 5' polyphosphatase (20 U/ug of RNA). Samples were then incubated for 30  
656 minutes at 37° C and purified via phenol/chloroform extraction and ethanol precipitation supplemented  
657 with sodium acetate and glycogen. sRNA libraries were then constructed using 1 ug of polyphosphatase-  
658 treated/untreated total RNA as input into the TruSeq Small RNA Library Preparation Kit with 11 cycles of  
659 PCR amplification. Libraries were then size selected on a Novex 6% TBE gel and purified.

660 For mRNA sequencing, 1 ug of total RNA was treated with Ribo-Zero Gold Epidemiology rRNA  
661 Removal Kit. A 1:100 dilution of ERCC RNA Spike-In Mix was added. Libraries were then prepared using  
662 the TruSeq RNA Library Prep Kit v2 with 13 cycles of PCR amplification.

663 All sequencing was performed using the Illumina HiSeq2500 at the Johns Hopkins University  
664 School of Medicine Genetic Resources Core Facility.

665

666 *High-throughput sequencing analyses:*

667 *sRNA sequencing*: 5' sequencing adapters were trimmed using Cutadapt with default settings  
668 (Martin, 2011). Reads longer than 30 nts and shorter than 18 nts were discarded. Reads were then  
669 aligned to the UCSC ce10 *C. elegans* reference genome using Bowtie 2 (Langmead and Salzberg, 2012).  
670 Reads mapping to genetic features were counted using HTSeq-count (Anders et al., 2015) and  
671 differential expression analysis was conducted using DESeq2 (Love et al., 2014). For all our sRNA  
672 analysis, reads were normalized based on library size.

673 For sRNA class analyses, piRNA and miRNA lists were downloaded from WormBase. All other  
674 sRNAs were placed in Argonaute classes based on the locus targeted and published lists of loci targeted  
675 by sRNAs immunoprecipitated with specific Argonautes from wild-type worm lysates [Gu et al., 2009  
676 (WAGO-1 IP), Xu et al, 2018 (WAGO-4 IP), Buckley et al., 2012 (HRDE-1 IP), and Claycomb et al., 2009  
677 (CSR-1 IP)].

678 *mRNA sequencing*: sequencing reads were aligned to the UCSC ce10 *C. elegans* reference  
679 genome using HISAT2 (Kim et al., 2015). Reads aligning to genetic features were then counted using  
680 HTSeq-count (Anders et al., 2015) and analyzed for differential expression analysis using DESeq2 (Love  
681 et al., 2014).

682 Genome browser views were adapted from IGV TDF file visualization with zoom levels set to 7,  
683 window function set to "Mean," and window size set to 5 (Robinson et al., 2011).

684 A list of high-throughput sequencing libraries generated in this study is listed in Table S6.

685

686 *Single molecule fluorescence in situ hybridization (smFISH)*:

687 smFISH probes for *rde-11* and *sid-1* were designed using Biosearch Technologies's Stellaris Probe  
688 Designer. The fluorophores used in this study were Quasar570 and Quasar670.

689 For sample preparation, embryos or adult germlines were extruded from adults on poly-lysine slides and  
690 subjected to freeze-crack followed by methanol fixation. Samples were washed five times in

691 PBS+0.1%Tween20 and fixed in 4% PFA for one hour at room temperature. Samples were again washed  
692 in PBS+0.1%Tween20 four times, twice in 2x SCC, and once in wash buffer (10% formamide, 2x SCC)

693 before blocking in hybridization buffer (10% formamide, 2x SCC, 200 ug/mL BSA, 2mM Ribonucleoside  
694 Vanadyl Complex, 0.2 mg/mL yeast total RNA, 10% dextran sulfate) for 30 minutes at 37° C.

695 Hybridization was then conducted by incubating samples with 50 nM probe solution diluted in

696 hybridization buffer overnight at 37° C. Following hybridization, samples were washed twice in wash

697 buffer at 37° C, twice in 2x SCC, once in PBS+0.1%Tween20, and twice in PBS. Lastly, samples were

698 mounted using VECTASHIELD Antifade Mounting Media with DAPI or Prolong Diamond Antifade  
699 Mountant.

700

701 *Microscopy:*

702 Fluorescence confocal microscopy was performed using a Zeiss Axio Imager with a Yokogawa  
703 spinning-disc confocal scanner. Images were taken using Slidebook v6.0 software (Intelligent Imaging  
704 Innovations) using a 63x objective. For imaging of primordial germ cells, fluorescence super-resolution  
705 microscopy was performed using ZEISS LSM 880-AiryScan (Carl Zeiss) equipped with a 63X objective.  
706 Images were acquired and processed using ZEN imaging software (Carl Zeiss). Equally normalized images  
707 were exported via either Slidebook v6.0 or ZEN, and contrasts of images were equally adjusted between  
708 control and experimental sets using ImageJ.

709

710 **Quantification and Statistical Analysis:**

711 Statistical analysis used in Figs 2, 4, S4, and 6 were performed using an unpaired t-test. Statistics  
712 for differential expression analysis were done using DESeq2 (Love et al., 2014).

713 FIJI was used for western blot quantification, *rde-11* smFISH signal quantification in the  
714 germline, and quantification of GFP::HRDE-1's nuclear to cytoplasmic ratio. For western blot  
715 quantification, ROIs of constant area were placed over the GFP and tubulin bands and the integrated  
716 density values were measured. The ratios between GFP signal and tubulin signal was then calculated.  
717 For the *rde-11* germline quantification, ROIs were drawn in the late pachytene region of the germline  
718 and mean intensity values were calculated using maximum projection images. Unstained germlines were  
719 then used for background calculation, which was then subtracted from the calculated mean intensity of  
720 the germlines with probes. These values were then normalized to the average of wild-type and plotted  
721 accordingly. For GFP::HRDE-1 nuclear to cytoplasmic ratio in the -2 oocyte, germlines were extruded and  
722 single plane images were taken of the -2 oocyte. ROIs were drawn in the nucleus and cytoplasm, and the  
723 ratio of the mean intensities was calculated for wild-type and *meg-3 meg-4*. For GFP::HRDE-1 nuclear to  
724 cytoplasmic ratio in the PGCs, single plane images were taken of wild-type and *meg-3 meg-4* embryos at  
725 comma-stage. In a similar manner to the adult germline, the mean intensities of the nucleus and  
726 cytoplasm were calculated and compared in a ratio.

727 smFISH quantification of PGC granule enrichment was conducted using Imaris Image Analysis  
728 Software visualization in 3D space. RNAs were counted manually, and the percentage localized in a  
729 GFP::PRG-1 granule was calculated.

730

731 **Data and Code Availability:**

732 Sequencing data has been deposited onto the Gene Expression Omnibus (GEO) and can be  
733 found using the following accession numbers:

734 XXXXXXXXXXXXXXXX

735 XXXXXXXXXXXXXXXX

736 XXXXXXXXXXXXXXXX

737 The *prg-1* sRNA sequencing data from Fig. S3D was obtained from SRR513312 (Lee et al., 2012)  
738 and its corresponding wild-type from SRR6691711 (Tang et al., 2018).

739

740 **Supplemental Information:**

741 **Fig. S1: related to Fig. 2**

742 A. Graph showing the percentage of viable embryos among broods laid by ~20 hermaphrodites of  
743 indicated genotypes fed with bacteria expressing *mex-5* and *mex-6* dsRNA from the L1 stage. Bar height  
744 represents the mean; error bars represent the standard deviation; the p-value was calculated using an  
745 unpaired t-test.

746 B. Crosses used to generate hermaphrodites with varying numbers of maternal and zygotic *meg-3 meg-4*  
747 alleles. *meg-3 meg-4*<sup>#1</sup> hermaphrodites and males were used in all crosses.

748 C. Graph showing the percentage of viable embryos among broods laid by ~12 hermaphrodites carrying  
749 a deletion at the *meg-3* locus. The three strains shown were generated by cloning non-edited siblings of  
750 the *meg-3 meg-4* hermaphrodites analyzed in Fig. 2B. See S1D for CRISPR scheme. Unlike the *meg-3*  
751 *meg-4* strains, all three *meg-3* strains exhibited complete RNAi penetrance (no viable progeny)  
752 throughout the experiment.

753 D. Genome editing scheme to generate new *meg-3 meg-4* double deletion strains (and control sibling  
754 strains) from a strain carrying a deletion in *meg-3*. A single F1 animal was used to establish each *meg-3*  
755 *meg-4* strain and its control sibling strain. F1 is Generation 1 in Figure 2B.

756

757 **Fig. S2: related to Fig. 3**

758 A. Western blot showing MEG-3 and MEG-4 protein levels in lysates collected at different  
759 developmental stages. Proteins were visualized using antibodies against epitope tags inserted at the  
760 *meg-3* and *meg-4* loci by genome editing. N2 refers to wild-type worms which do not contain epitope  
761 tags at the *meg-3* and *meg-4* loci. All other lanes were loaded with lysates prepared from worms in



762 which *meg-3* and *meg-4* loci were tagged with OLLAS and 3xFLAG, respectively. Embryo Prep 1 lysate  
763 was prepared from embryos collected from 1-day old synchronized hermaphrodites. Embryo Prep 2  
764 lysate was prepared from embryos collected from 1 to 3-day old hermaphrodites. L1 and L4 are first and  
765 fourth larval stages, respectively, and contain no embryos. Gravid adults contain embryos. Tubulin is  
766 used here as a loading control.

767 B. Box plots showing the log<sub>2</sub> fold change in abundance for the indicated classes of sRNAs in *meg-3*  
768 *meg-4*<sup>#1</sup> animals compared to wild-type (Gu et al., 2009; Xu et al., 2018; Buckley et al., 2012; Claycomb  
769 et al., 2009; WormBase WS270). Boxes indicate the interquartile range; whiskers indicate the upper and  
770 lower quartiles; lines within the boxes indicate the median; notches display the confidence interval  
771 around the median. Parenthetical numbers indicate the number of sRNA-mapping genes represented by  
772 the respective box. Note that the WAGO-1 sRNA class as reported by Gu et al., 2009 only includes the  
773 ~80 highest ranked sRNAs that immunoprecipitated with WAGO-1. As such, the WAGO-1 class of sRNAs  
774 may be underrepresented in our analysis.

775 C-D. sRNA length distribution and 5' nucleotide preference of sRNAs in wild-type and *meg-3 meg-4*<sup>#1</sup>.

776 E-G. Scatter plots comparing sRNA abundance in wild-type (X-axis) and *meg-3 meg-4* (Y-axis)  
777 hermaphrodites in the indicated *meg-3 meg-4* strains. Each dot represents an annotated locus in the *C.*  
778 *elegans* genome. Red dots represent loci with significantly upregulated or downregulated sRNAs as  
779 determined from analysis using two biological replicates for each genotype.

780

781 **Fig. S3: related to Fig. 4**

782 A. Browser view of the *rde-11/B0564.2* locus showing normalized sRNA reads in wild-type, *meg-3 meg-4*  
783 <sup>#1</sup>, *meg-3 meg-4*<sup>#2</sup>, *meg-3 meg-4*<sup>#3</sup>, and *meg-3 meg-4*<sup>#4</sup> mixed population. Lower panel shows mRNAseq  
784 data from *meg-3 meg-4*<sup>#1</sup> adults. Note the increase in sRNA reads and decrease in mRNA reads at both  
785 loci in *meg-3 meg-4*<sup>#1</sup> worms.

786 B. Crosses used to generate *hrde-1; meg-3 meg-4* triple mutant. Genotypes were determined by PCR.

787 C. Bar graph showing the log<sub>2</sub> fold change in sRNAs mapping to the indicated loci in the indicated  
788 genotypes compared to wild-type. The graphs represent the log<sub>2</sub> fold change from two biological  
789 replicates for each genotype. Stars indicate statistical significance in the comparison between *meg-3*  
790 *meg-4* and *hrde-1; meg-3 meg-4* by DESeq2.

791 D. Browser view of the *rde-11/B0564.2* and *sid-1* loci showing normalized sRNA reads in the indicated  
792 genotypes. Data from Tang et al., 2018/Lee et al., 2012. At both loci, sRNAs decrease in *prg-1* mutants.

793 E. mRNA and sRNA fold changes and RPM values in *prg-1* compared to wild-type at the *sid-1*, *rde-11* loci  
794 from the indicated published studies.

795 F. Crosses used to generate *prg-1*; *meg-3 meg-4*, *znfx-1*; *meg-3 meg-4*, and *wago-4*; *meg-3 meg-4*  
796 strains. Genotypes were determined by PCR.

797 G. Maximum projection photomicrographs of adult gonads of the indicated genotypes hybridized to  
798 fluorescent probes to visualize *rde-11* transcripts (quantified in Fig. 4C). Red stippled lines highlight the  
799 late pachytene region. Scale bar represents 10  $\mu$ m.

800

801 **Fig. S4: related to Fig. 5**

802 A. Photomicrographs showing germ cell nuclei (pachytene stage) in adult hermaphrodites of the  
803 indicated genotypes. No difference in the distribution in ZNFX-1, MUT-16 or PGL-1 are visible between  
804 wild-type and *meg-3 meg-4* at this stage. Scale bar is 2  $\mu$ m.

805 B. Same as A, but close-up showing the P granule - Z granule - Mutator pattern reported in Wan et al.,  
806 2018. Same pattern is visible in both wild-type and *meg-3 meg-4* strains. Scale bar is 500 nm.

807 C. Anti-GFP/anti- $\alpha$ -Tub western blot of the indicated strains to assess levels of GFP::PRG-1 and GFP::CSR-  
808 1 in wild-type vs *meg-3 meg-4* adults. The ratio of GFP:Tubulin signal was measured and plotted  
809 accordingly. Bar height indicates the mean value; error bars represent the standard deviation; p-values  
810 were calculated using an unpaired t-test. Only fertile *meg-3 meg-4* adult worms were used in this  
811 analysis. No significance differences in PRG-1 and CSR-1 levels were detected.

812 D-E. Functional validation of the *gfp::csr-1* and *gfp::hrde-1* lines. Strains were grown at 20° C and 25° C  
813 respectively and brood sizes were measured. Loss of function alleles for *csr-1* and *hrde-1* were included  
814 as a reference. Bar height indicates the mean value; error bars represent the standard deviation; p-  
815 values were calculated using an unpaired t-test.

816 F. Photomicrographs (also shown in Fig. 5A-B) of single primordial germ cells at comma-stage to show  
817 unadjusted *meg-3 meg-4* panels (last row). Acquisition and display parameters for panels in first and  
818 second rows are identical, and demonstrate the lower levels of PRG-1/ZNFX-1/PGL-1 in *meg-3 meg-4*  
819 compared to wild-type. Panels in the last row (asterisk) have been enhanced for brightness to reveal the  
820 distribution of the low levels of PRG-1/ZNFX-1/PGL-1 in *meg-3 meg-4* mutants. Scale bar is 2  $\mu$ m.

821 G. Photomicrographs showing GFP::HRDE-1 in oocytes of adult hermaphrodites (top row) and in  
822 primordial germ cells of comma-stage embryos (bottom row) comparing wild-type and *meg-3 meg-4*.

823 White stippled lines indicate cell outline. Scale bar represents 10  $\mu$ m in both cases.

824 H. Quantitation of the nuclear-to-cytoplasmic ratio of GFP::HRDE-1. Note the higher ratio in *meg-3 meg-*  
825 *4* primordial germ cells (PGC). Each dot represents one oocyte or one embryo.

826

827 **Fig. S5: related to Fig. 6**

828 Photomicrographs of *pgl-1::gfp* embryos hybridized to fluorescent probes to visualize *rde-11* and *sid-1*  
829 transcripts (GFP not shown). Transcripts in 2-cell embryos represent maternal transcripts (white stippled  
830 cell is somatic blastomere AB, red stippled cell is germline blastomere P<sub>1</sub>). Transcripts in later comma-  
831 stage embryos are likely zygotic transcripts. Stippled white lines indicate embryo outline, stippled red  
832 lines indicate germ cell outline. Scale bar is 2 μm.

833

834 **Table S1.** Genes with sRNAs up in all four *meg-3 meg-4* strains.

835

836 **Table S2.** Genes with sRNAs down in all four *meg-3 meg-4* strains.

837

838 **Table S3.** Genes involved in RNAi.

839

840 **Table S4.** Misregulated *meg-3 meg-4* sRNAs rescued in *hrde-1; meg-3 meg-4*.

841

842 **Table S5.** List of guides, repair templates, and oligos used in this study.

843

844 **Table S6.** List of high-throughput sequencing libraries used in this study.

845

## 846 **References**

847 Anders, S., Pyl, P. T., & Huber, W. (2015). HTSeq--a Python framework to work with high-throughput  
848 sequencing data. *Bioinformatics*, 31(2), 166–169. <https://doi.org/10.1093/bioinformatics/btu638>

849 Ashe, A., Sapetschnig, A., Weick, E.-M., Mitchell, J., Bagijn, M. P., Cording, A. C., ... Miska, E. A. (2012).  
850 piRNAs Can Trigger a Multigenerational Epigenetic Memory in the Germline of *C. elegans*. *Cell*, 150(1),  
851 88–99. <https://doi.org/10.1016/j.cell.2012.06.018>

852 Batista, P. J., Ruby, J. G., Claycomb, J. M., Chiang, R., Fahlgren, N., Kasschau, K. D., ... Mello, C. C. (2008).  
853 PRG-1 and 21U-RNAs Interact to Form the piRNA Complex Required for Fertility in *C. elegans*. *Molecular*  
854 *Cell*, 31(1), 67–78. <https://doi.org/10.1016/J.MOLCEL.2008.06.002>

- 855 Belicard, T., Jareosettasin, P., & Sarkies, P. (2018). The piRNA pathway responds to environmental  
856 signals to establish intergenerational adaptation to stress. *BMC Biology*, 16(1), 103.  
857 <https://doi.org/10.1186/s12915-018-0571-y>
- 858 Blumenthal, T., & Gleason, K. S. (2003). *Caenorhabditis elegans* operons: form and function. *Nature*  
859 *Reviews Genetics*, 4(2), 110–118. <https://doi.org/10.1038/nrg995>
- 860 Brennecke, J., Malone, C. D., Aravin, A. A., Sachidanandam, R., Stark, A., & Hannon, G. J. (2008). An  
861 Epigenetic Role for Maternally Inherited piRNAs in Transposon Silencing. *Science*, 322(5906), 1387–  
862 1392. <https://doi.org/10.1126/science.1165171>
- 863 Buckley, B. A., Burkhart, K. B., Gu, S. G., Spracklin, G., Kershner, A., Fritz, H., ... Kennedy, S. (2012). A  
864 nuclear Argonaute promotes multigenerational epigenetic inheritance and germline immortality.  
865 *Nature*, 489(7416), 447–451. <https://doi.org/10.1038/nature11352>
- 866 Cecere, G., Hoersch, S., Jensen, M. B., Dixit, S., & Grishok, A. (2013). The ZFP-1(AF10)/DOT-1 complex  
867 opposes H2B ubiquitination to reduce Pol II transcription. *Molecular Cell*, 50(6), 894–907.  
868 <https://doi.org/10.1016/j.molcel.2013.06.002>
- 869 Cecere, G., Hoersch, S., O’Keeffe, S., Sachidanandam, R., & Grishok, A. (2014). Global effects of the CSR-1  
870 RNA interference pathway on the transcriptional landscape. *Nature Structural & Molecular Biology*,  
871 21(4), 358–365. <https://doi.org/10.1038/nsmb.2801>
- 872 Claycomb, J. M., Batista, P. J., Pang, K. M., Gu, W., Vasale, J. J., van Wolfswinkel, J. C., ... Mello, C. C.  
873 (2009). The Argonaute CSR-1 and Its 22G-RNA Cofactors Are Required for Holocentric Chromosome  
874 Segregation. *Cell*, 139(1), 123–134. <https://doi.org/10.1016/j.cell.2009.09.014>
- 875 de Albuquerque, B. F. M., Placentino, M., & Ketting, R. F. (2015). Maternal piRNAs Are Essential for  
876 Germline Development following De Novo Establishment of Endo-siRNAs in *Caenorhabditis elegans*.  
877 *Developmental Cell*, 34(4), 448–456. <https://doi.org/10.1016/j.devcel.2015.07.010>
- 878 Dickinson, D. J., Pani, A. M., Heppert, J. K., Higgins, C. D., & Goldstein, B. (2015). Streamlined Genome  
879 Engineering with a Self-Excising Drug Selection Cassette. *Genetics*, 200(4), 1035–1049.  
880 <https://doi.org/10.1534/genetics.115.178335>
- 881 Feinberg, E. H., & Hunter, C. P. (2003). Transport of dsRNA into Cells by the Transmembrane Protein SID-  
882 1. *Science*, 301(5639), 1545–1547. <https://doi.org/10.1126/science.1087117>

- 883 Folkmann, A. W., & Seydoux, G. (2019). Spatial regulation of the polarity kinase PAR-1 by parallel  
884 inhibitory mechanisms. *Development (Cambridge, England)*, 146(6), dev.171116.  
885 <https://doi.org/10.1242/dev.171116>
- 886 Gu, W., Shirayama, M., Conte, D., Vasale, J., Batista, P. J., Claycomb, J. M., ... Mello, C. C. (2009). Distinct  
887 Argonaute-Mediated 22G-RNA Pathways Direct Genome Surveillance in the *C. elegans* Germline.  
888 *Molecular Cell*, 36(2), 231–244. <https://doi.org/10.1016/j.molcel.2009.09.020>
- 889 Guang, S., Bochner, A. F., Pavelec, D. M., Burkhart, K. B., Harding, S., Lachowiec, J., & Kennedy, S. (2008).  
890 An Argonaute Transports siRNAs from the Cytoplasm to the Nucleus. *Science*, 321(5888), 537–541.  
891 <https://doi.org/10.1126/science.1157647>
- 892 Houri-Ze'evi, L., Korem, Y., Sheftel, H., Faigenbloom, L., Toker, I. A., Dagan, Y., ... Rechavi, O. (2016). A  
893 Tunable Mechanism Determines the Duration of the Transgenerational Small RNA Inheritance in *C.*  
894 *elegans*. *Cell*, 165(1), 88–99. <https://doi.org/10.1016/J.CELL.2016.02.057>
- 895 Huang, X., Fejes Tóth, K., & Aravin, A. A. (2017). piRNA Biogenesis in *Drosophila melanogaster*. *Trends in*  
896 *Genetics*, 33(11), 882–894. <https://doi.org/10.1016/j.tig.2017.09.002>
- 897 Ishidate, T., Ozturk, A. R., Durning, D. J., Seth, M., Shirayama, M., Mello Correspondence, C. C., ... Mello,  
898 C. C. (2018). ZNFX-1 Functions within Perinuclear Nuage to Balance Epigenetic Signals Article ZNFX-1  
899 Functions within Perinuclear Nuage to Balance Epigenetic Signals. *Molecular Cell*, 70, 639–649.  
900 <https://doi.org/10.1016/j.molcel.2018.04.009>
- 901 Kawasaki, I., Shim, Y. H., Kirchner, J., Kaminker, J., Wood, W. B., & Strome, S. (1998). PGL-1, a predicted  
902 RNA-binding component of germ granules, is essential for fertility in *C. elegans*. *Cell*, 94(5), 635–645.  
903 [https://doi.org/10.1016/S0092-8674\(00\)81605-0](https://doi.org/10.1016/S0092-8674(00)81605-0)
- 904 Kim, D., Langmead, B., & Salzberg, S. L. (2015). HISAT: a fast spliced aligner with low memory  
905 requirements. *Nature Methods*, 12(4), 357–360. <https://doi.org/10.1038/nmeth.3317>
- 906 Kim, J. K., Gabel, H. W., Kamath, R. S., Tewari, M., Pasquinelli, A., Rual, J.-F., ... Ruvkun, G. (2005).  
907 Functional Genomic Analysis of RNA Interference in *C. elegans*. *Science*, 308(5725), 1164–1167.  
908 <https://doi.org/10.1126/science.1109267>
- 909 Langmead, B., & Salzberg, S. L. (2012). Fast gapped-read alignment with Bowtie 2. *Nature Methods*, 9(4),  
910 357–359. <https://doi.org/10.1038/nmeth.1923>

- 911 Lee, H.-C., Gu, W., Shirayama, M., Youngman, E., Conte, D., & Mello, C. C. (2012). C. elegans piRNAs  
912 Mediate the Genome-wide Surveillance of Germline Transcripts. *Cell*, 150(1), 78–87.  
913 <https://doi.org/10.1016/J.CELL.2012.06.016>
- 914 Lev, I., Toker, I. A., Mor, Y., Nitzan, A., Weintraub, G., Bhonkar, O., ... Rechavi, O. (2019). Germ Granules  
915 Functions are Memorized by Transgenerationally Inherited Small RNAs. *BioRxiv*, 576934.  
916 <https://doi.org/10.1101/576934>
- 917 Li, H., Handsaker, B., Wysoker, A., Fennell, T., Ruan, J., Homer, N., ... 1000 Genome Project Data  
918 Processing Subgroup. (2009). The Sequence Alignment/Map format and SAMtools. *Bioinformatics*,  
919 25(16), 2078–2079. <https://doi.org/10.1093/bioinformatics/btp352>
- 920 Love, M. I., Huber, W., & Anders, S. (2014). Moderated estimation of fold change and dispersion for  
921 RNA-seq data with DESeq2. *Genome Biology*, 15(12), 550. <https://doi.org/10.1186/s13059-014-0550-8>
- 922 Martin, M. (2011). Cutadapt removes adapter sequences from high-throughput sequencing reads.  
923 *EMBnet.Journal*, 17(1), 10. <https://doi.org/10.14806/ej.17.1.200>
- 924 Mainpal, R., Nance, J., & Yanowitz, J. L. (2015). A germ cell determinant reveals parallel pathways for  
925 germ line development in *Caenorhabditis elegans*. *Development (Cambridge, England)*, 142(20), 3571–  
926 3582. <https://doi.org/10.1242/dev.125732>
- 927 McMurchy, A. N., Stempor, P., Gaarenstroom, T., Wysolmerski, B., Dong, Y., Aussianikava, D., ...  
928 Ahringer, J. (2017). Correction: A team of heterochromatin factors collaborates with small RNA  
929 pathways to combat repetitive elements and germline stress. *ELife*, 6.  
930 <https://doi.org/10.7554/eLife.32516>
- 931 Minkina, O., & Hunter, C. P. (2017). Stable Heritable Germline Silencing Directs Somatic Silencing at an  
932 Endogenous Locus. *Molecular Cell*, 65(4), 659-670.e5. <https://doi.org/10.1016/j.molcel.2017.01.034>
- 933 Paix, A., Folkmann, A., & Seydoux, G. (2017). Precision genome editing using CRISPR-Cas9 and linear  
934 repair templates in *C. elegans*. *Methods*, 121–122, 86–93. <https://doi.org/10.1016/j.ymeth.2017.03.023>
- 935 Pak, J., & Fire, A. (2007). Distinct Populations of Primary and Secondary Effectors During RNAi in *C.*  
936 *elegans*. *Science*, 315(5809), 241–244. <https://doi.org/10.1126/science.1132839>

- 937 Phillips, C. M., Montgomery, T. A., Breen, P. C., & Ruvkun, G. (2012). MUT-16 promotes formation of  
938 perinuclear Mutator foci required for RNA silencing in the *C. elegans* germline. *Genes & Development*,  
939 26(13), 1433–1444. <https://doi.org/10.1101/gad.193904.112>
- 940 Phillips, C. M., Brown, K. C., Montgomery, B. E., Ruvkun, G., & Montgomery, T. A. (2015). piRNAs and  
941 piRNA-Dependent siRNAs Protect Conserved and Essential *C. elegans* Genes from Misrouting into the  
942 RNAi Pathway. *Developmental Cell*, 34(4), 457–465. <https://doi.org/10.1016/j.devcel.2015.07.009>
- 943 Putnam, A., Cassani, M., Smith, J., & Seydoux, G. (2019). A gel phase promotes condensation of liquid P  
944 granules in *Caenorhabditis elegans* embryos. *Nature Structural & Molecular Biology*, 26(3), 220–226.  
945 <https://doi.org/10.1038/s41594-019-0193-2>
- 946 Robinson, J. T., Thorvaldsdóttir, H., Winckler, W., Guttman, M., Lander, E. S., Getz, G., & Mesirov, J. P.  
947 (2011). Integrative genomics viewer. *Nature Biotechnology*, 29(1), 24–26.  
948 <https://doi.org/10.1038/nbt.1754>
- 949 Robinson, J. T., Thorvaldsdóttir, H., Winckler, W., Guttman, M., Lander, E. S., Getz, G., & Mesirov, J. P.  
950 (2011). Integrative genomics viewer. *Nature Biotechnology*, 29(1), 24–26.  
951 <https://doi.org/10.1038/nbt.1754>
- 952 Schaner, C. E., Deshpande, G., Schedl, P. D., & Kelly, W. G. (2003). A conserved chromatin architecture  
953 marks and maintains the restricted germ cell lineage in worms and flies. *Developmental Cell*, 5(5), 747–  
954 757. Retrieved from <http://www.ncbi.nlm.nih.gov/pubmed/14602075>
- 955 Schubert, C. M., Lin, R., de Vries, C. J., Plasterk, R. H., & Priess, J. R. (2000). MEX-5 and MEX-6 function to  
956 establish soma/germline asymmetry in early *C. elegans* embryos. *Molecular Cell*, 5(4), 671–682.  
957 Retrieved from <http://www.ncbi.nlm.nih.gov/pubmed/10882103>
- 958 Seth, M., Shirayama, M., Gu, W., Ishidate, T., Conte, D., & Mello, C. C. (2013). The *C. elegans* CSR-1  
959 Argonaute Pathway Counteracts Epigenetic Silencing to Promote Germline Gene Expression.  
960 *Developmental Cell*, 27(6), 656–663. <https://doi.org/10.1016/J.DEVCEL.2013.11.014>
- 961 Shen, E.-Z., Chen, H., Ozturk, A. R., Tu, S., Shirayama, M., Tang, W., ... Mello, C. C. (2018). Identification of  
962 piRNA Binding Sites Reveals the Argonaute Regulatory Landscape of the *C. elegans* Germline. *Cell*,  
963 172(5), 937–951.e18. <https://doi.org/10.1016/j.cell.2018.02.002>

- 964 Shirayama, M., Seth, M., Lee, H.-C., Gu, W., Ishidate, T., Conte, D., & Mello, C. C. (2012). piRNAs initiate  
965 an epigenetic memory of nonself RNA in the *C. elegans* germline. *Cell*, 150(1), 65–77.  
966 <https://doi.org/10.1016/j.cell.2012.06.015>
- 967 Sijen, T., Steiner, F. A., Thijssen, K. L., & Plasterk, R. H. A. (2007). Secondary siRNAs Result from  
968 Unprimed RNA Synthesis and Form a Distinct Class. *Science*, 315(5809), 244–247.  
969 <https://doi.org/10.1126/science.1136699>
- 970 Subramaniam, K., & Seydoux, G. (1999). *nos-1* and *nos-2*, two genes related to *Drosophila nanos*,  
971 regulate primordial germ cell development and survival in *Caenorhabditis elegans*. *Development*  
972 (Cambridge, England), 126, 4861–4871. Retrieved from <http://www.ncbi.nlm.nih.gov/pubmed/8787767>
- 973 Tabara, H., Hill, R. J., Mello, C. C., Priess, J. R., & Kohara, Y. (1999). *pos-1* encodes a cytoplasmic zinc-  
974 finger protein essential for germline specification in *C. elegans*. *Development* (Cambridge, England),  
975 126(1), 1–11. Retrieved from <http://www.ncbi.nlm.nih.gov/pubmed/9834181>
- 976 Wan, G., Fields, B. D., Spracklin, G., Shukla, A., Phillips, C. M., & Kennedy, S. (2018). Spatiotemporal  
977 regulation of liquid-like condensates in epigenetic inheritance. *Nature*, 557(7707), 679–683.  
978 <https://doi.org/10.1038/s41586-018-0132-0>
- 979 Wang, G., & Reinke, V. (2008). A *C. elegans* Piwi, PRG-1, Regulates 21U-RNAs during Spermatogenesis.  
980 *Current Biology*, 18(12), 861–867. <https://doi.org/10.1016/J.CUB.2008.05.009>
- 981 Wang, J. T., & Seydoux, G. (2013). Germ Cell Specification. In *Advances in experimental medicine and*  
982 *biology* (Vol. 757, pp. 17–39). [https://doi.org/10.1007/978-1-4614-4015-4\\_2](https://doi.org/10.1007/978-1-4614-4015-4_2)
- 983 Wang, J. T., Smith, J., Chen, B.-C., Schmidt, H., Rasoloson, D., Paix, A., ... Seydoux, G. (2014). Regulation  
984 of RNA granule dynamics by phosphorylation of serine-rich, intrinsically disordered proteins in *C.*  
985 *elegans*. *ELife*, 3. <https://doi.org/10.7554/eLife.04591>
- 986 Wang, E., & Hunter, C. P. (2017). SID-1 Functions in Multiple Roles To Support Parental RNAi in  
987 *Caenorhabditis elegans*. *Genetics*, 207(2), 547–557. <https://doi.org/10.1534/genetics.117.300067>
- 988 Winston, W. M., Molodowitch, C., & Hunter, C. P. (2002). Systemic RNAi in *C. elegans* Requires the  
989 Putative Transmembrane Protein SID-1. *Science*, 295(5564), 2456–2459.  
990 <https://doi.org/10.1126/science.1068836>



- 991 Yang, H., Zhang, Y., Vallandingham, J., Li, H., Li, H., Florens, L., & Mak, H. Y. (2012). The RDE-10/RDE-11  
992 complex triggers RNAi-induced mRNA degradation by association with target mRNA in *C. elegans*. *Genes  
993 & Development*, 26(8), 846–856. <https://doi.org/10.1101/gad.180679.111>
- 994 Yigit, E., Batista, P. J., Bei, Y., Pang, K. M., Chen, C.-C. G., Tolia, N. H., ... Mello, C. C. (2006). Analysis of the  
995 *C. elegans* Argonaute family reveals that distinct Argonautes act sequentially during RNAi. *Cell*, 127(4),  
996 747–757. <https://doi.org/10.1016/j.cell.2006.09.033>
- 997 Zhang, C., Montgomery, T. A., Gabel, H. W., Fischer, S. E. J., Phillips, C. M., Fahlgren, N., ... Ruvkun, G.  
998 (n.d.). *mut-16* and other mutator class genes modulate 22G and 26G siRNA pathways in *Caenorhabditis  
999 elegans*. <https://doi.org/10.1073/pnas.1018695108>
- 1000 Zhang, C., Montgomery, T. A., Fischer, S. E. J., Garcia, S. M. D. A., Riedel, C. G., Fahlgren, N., ... Ruvkun, G.  
1001 (2012). The *Caenorhabditis elegans* RDE-10/RDE-11 Complex Regulates RNAi by Promoting Secondary  
1002 siRNA Amplification. *Current Biology*, 22(10), 881–890. <https://doi.org/10.1016/j.cub.2012.04.011>
- 1003 Zhang, D., Tu, S., Stubna, M., Wu, W.-S., Huang, W.-C., Weng, Z., & Lee, H.-C. (2018). The piRNA targeting  
1004 rules and the resistance to piRNA silencing in endogenous genes. *Science*, 359(6375), 587–592.  
1005 <https://doi.org/10.1126/science.aao2840>
- 1006 Zhang, Y., Yan, L., Zhou, Z., Yang, P., Tian, E., Zhang, K., ... Zhang, H. (2009). SEPA-1 Mediates the Specific  
1007 Recognition and Degradation of P Granule Components by Autophagy in *C. elegans*. *Cell*, 136(2), 308–  
1008 321. <https://doi.org/10.1016/J.CELL.2008.12.022>

## Figure 1

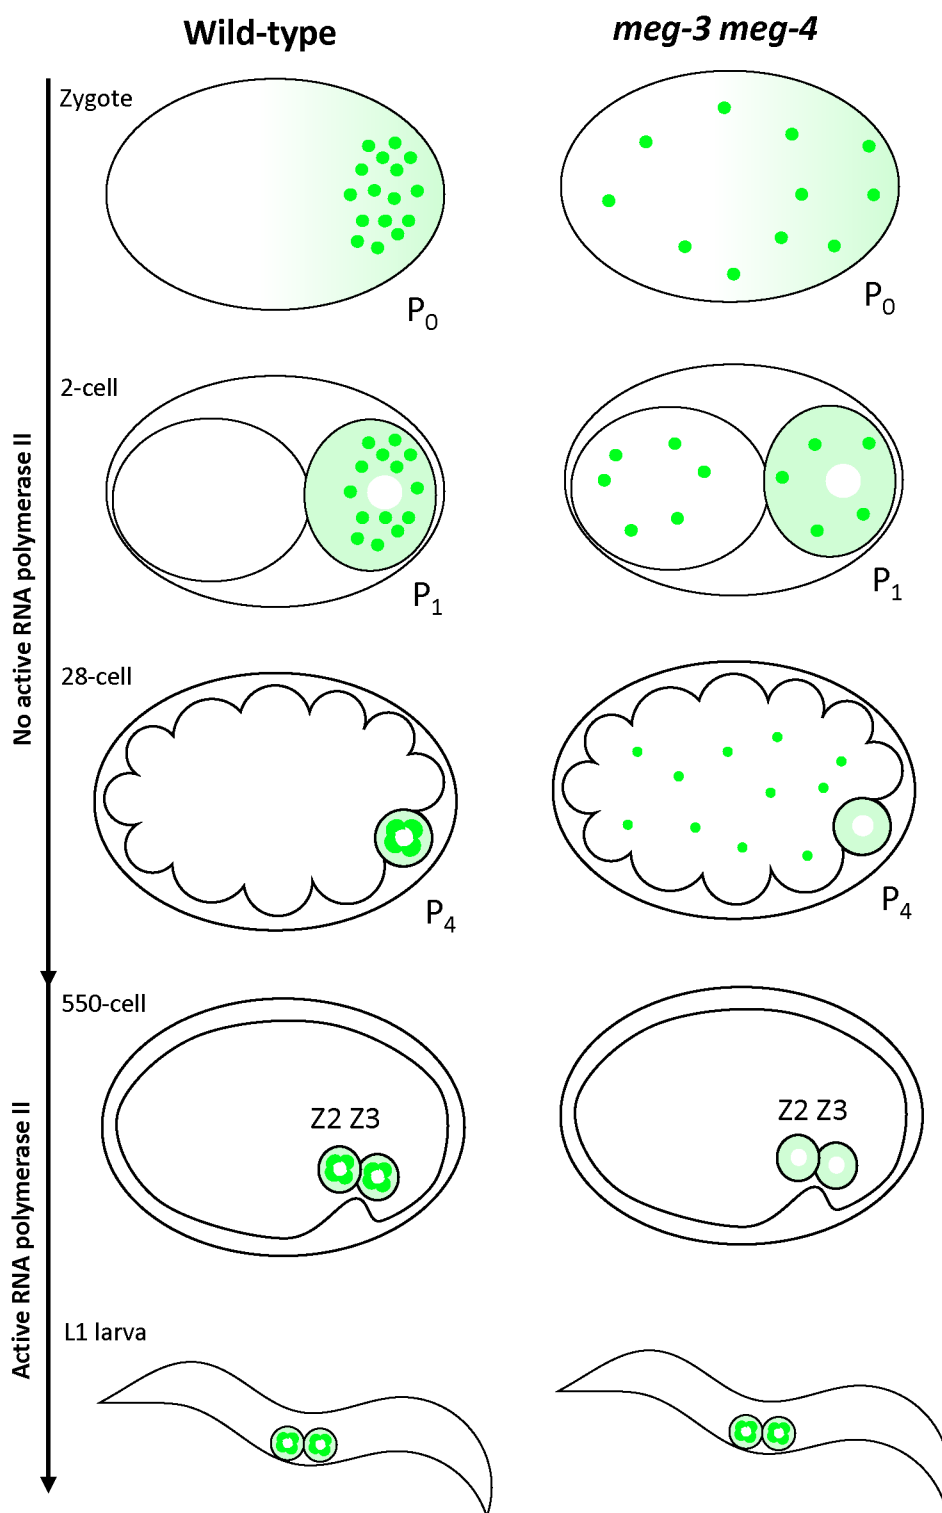

## Figure 2

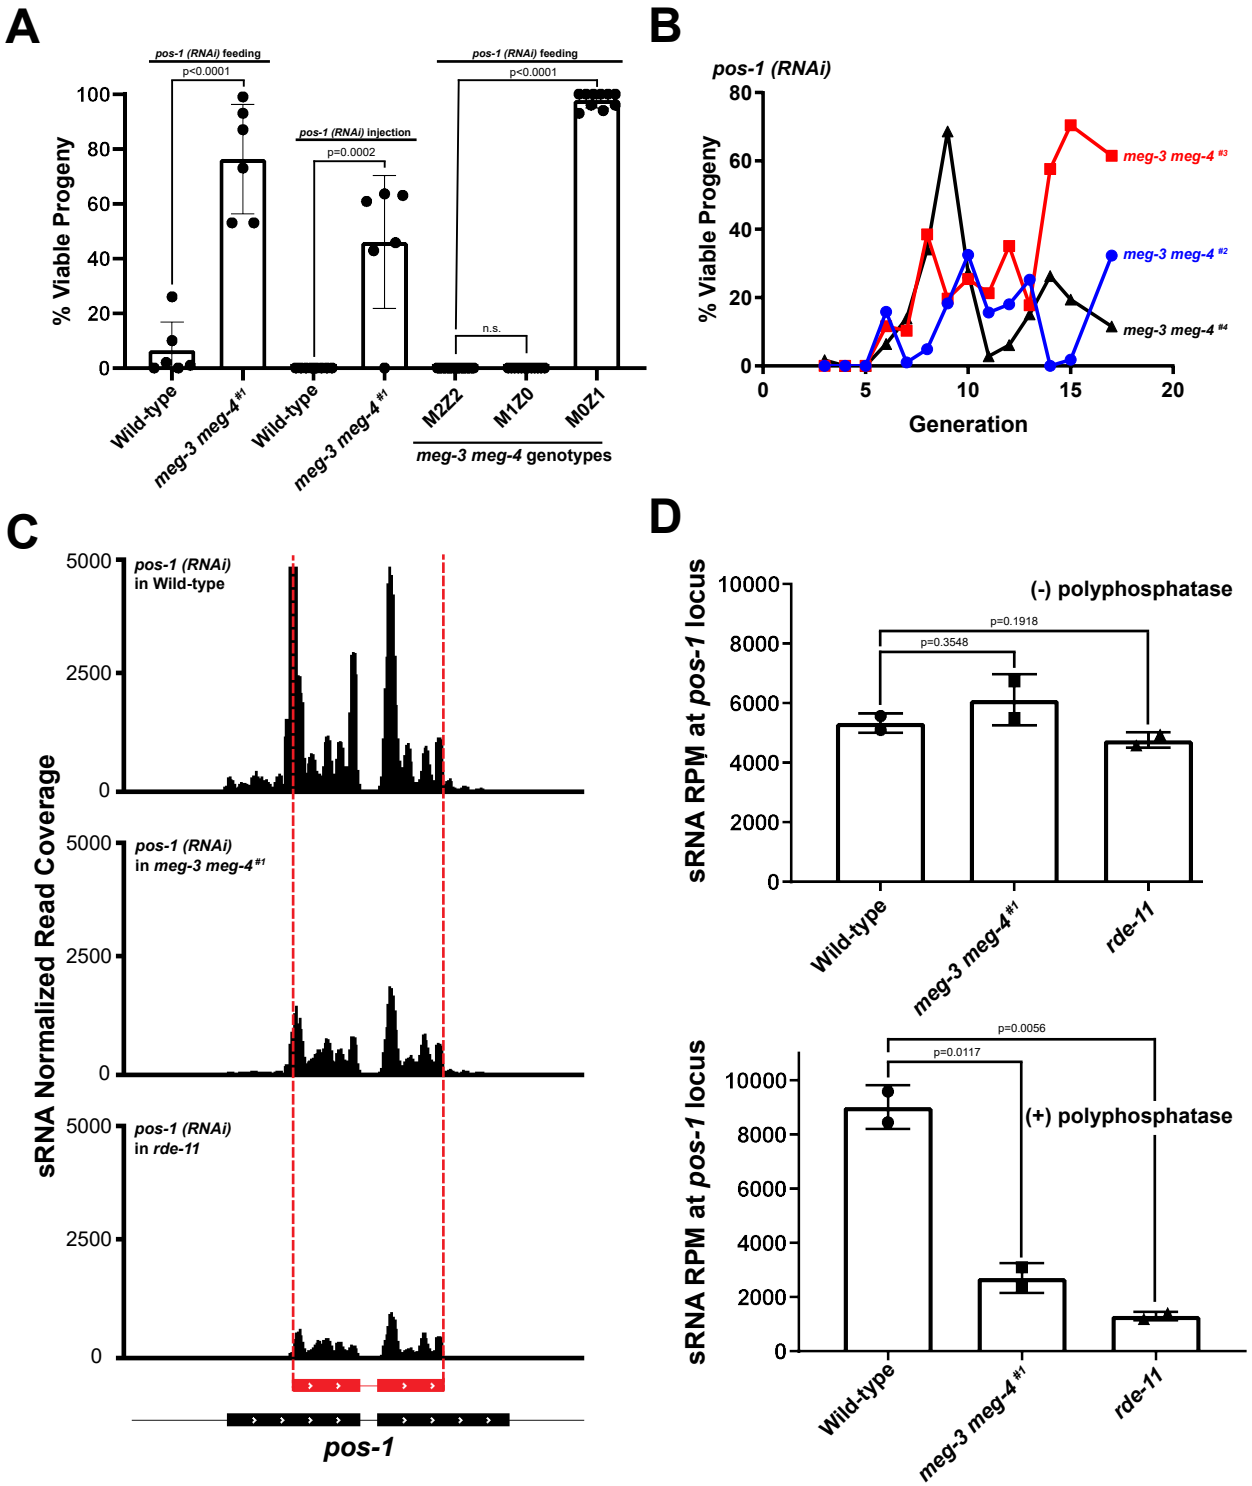

## Figure 3

**A**

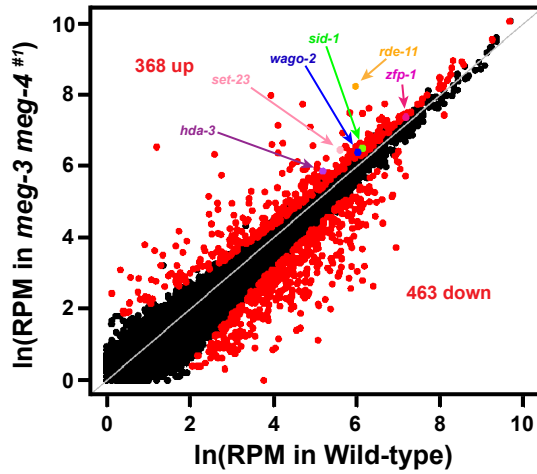

**B**

### Misregulated sRNAs in *meg-3 meg-4* (619 total)

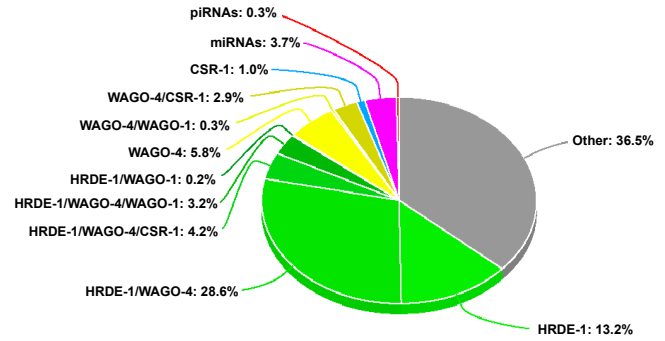

**C**

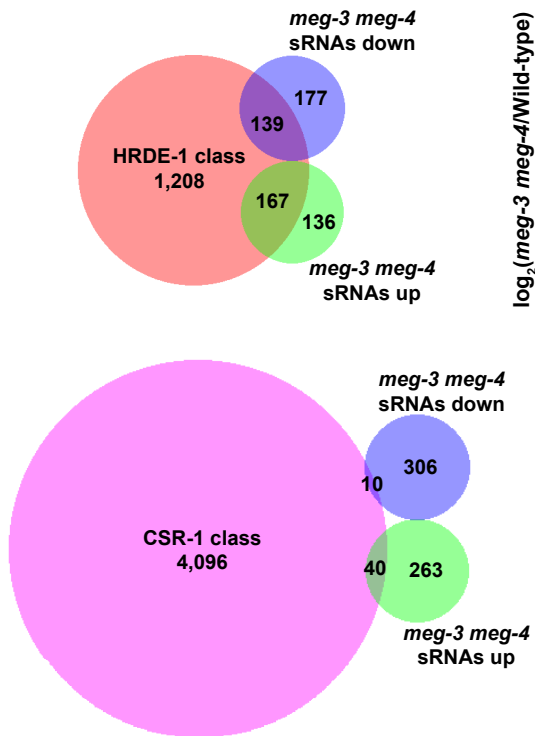

**D**

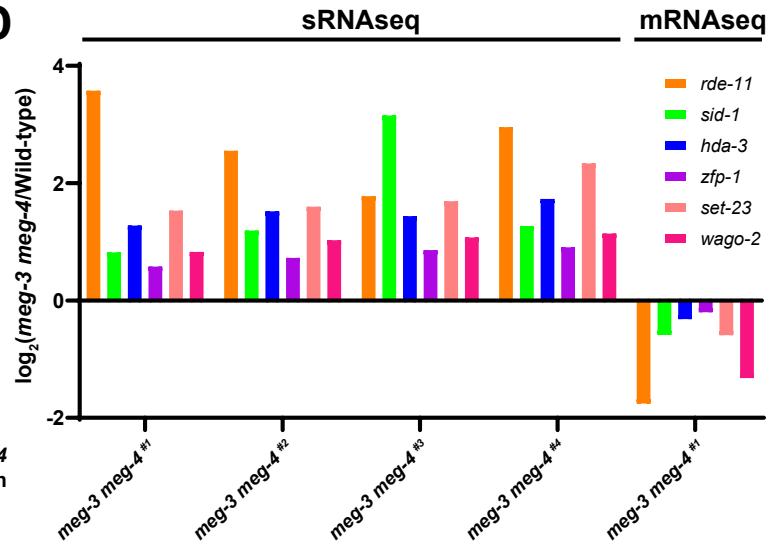

**E**

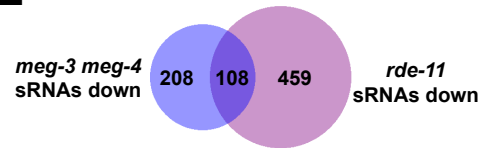

## Figure 4

**A**

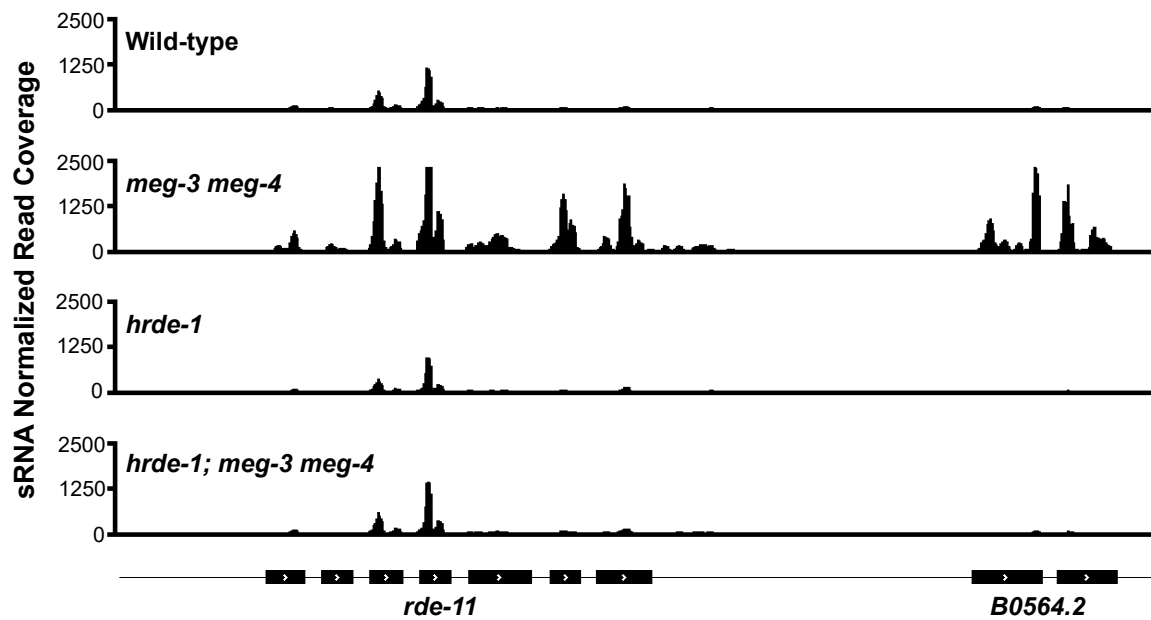

**B**

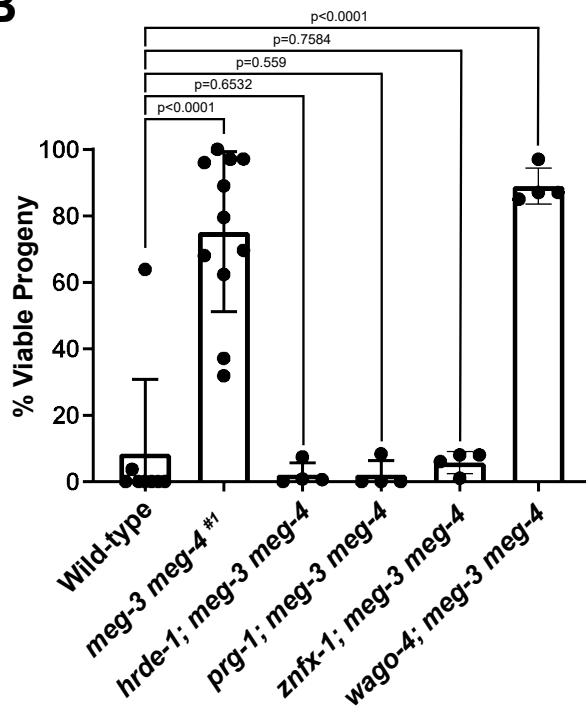

**C**

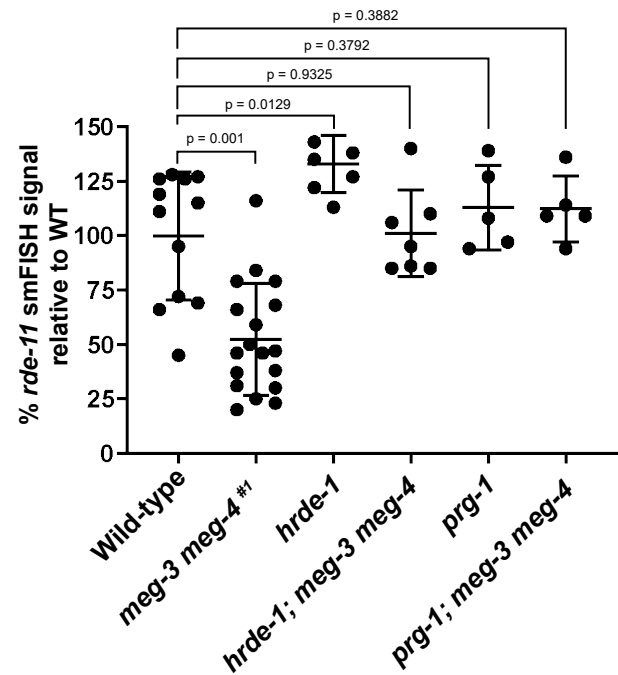

## Figure 5

A

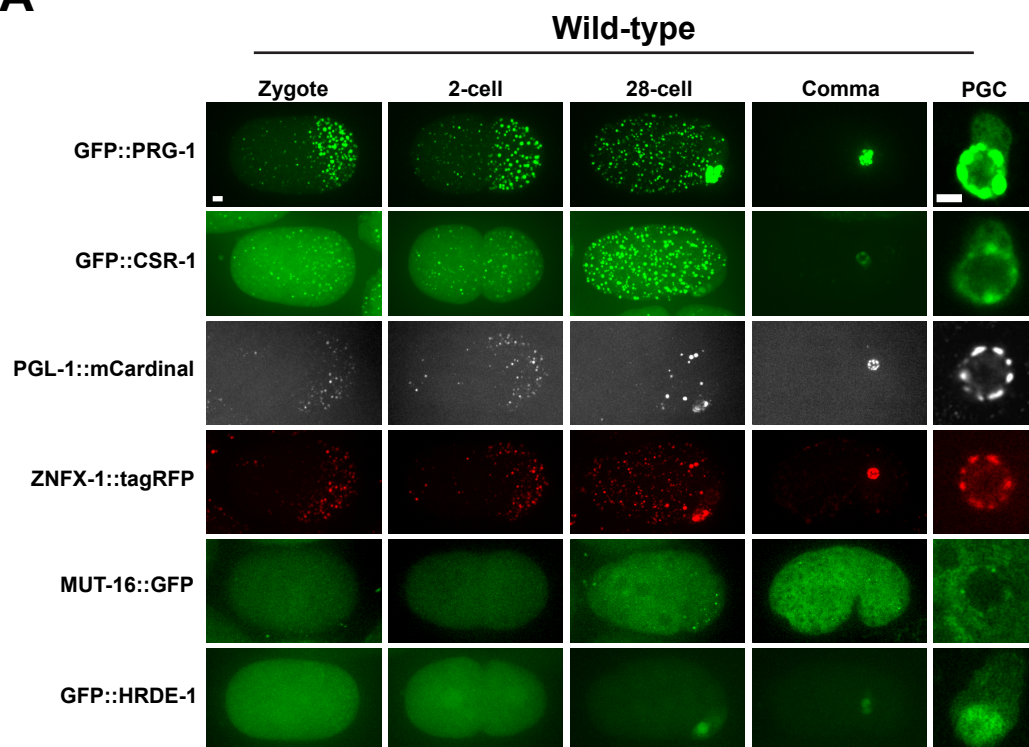

B

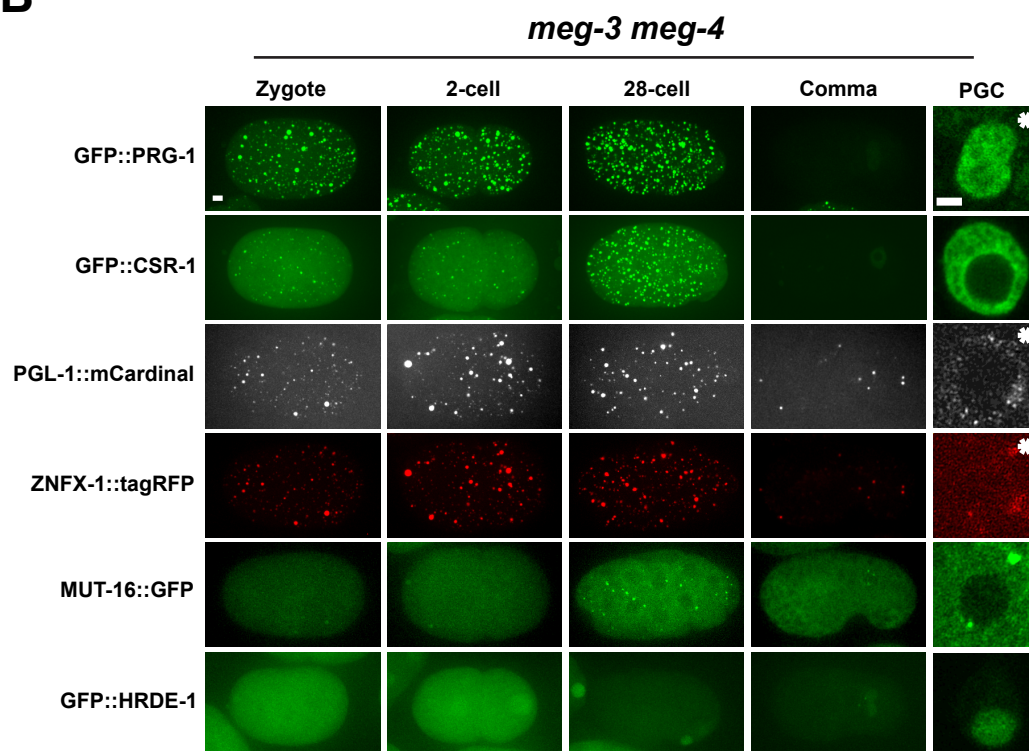

## Figure 6

**A**

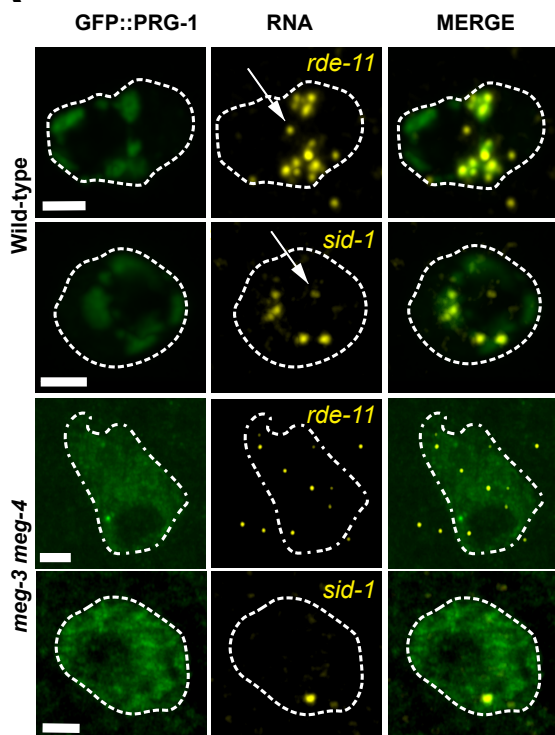

**B**

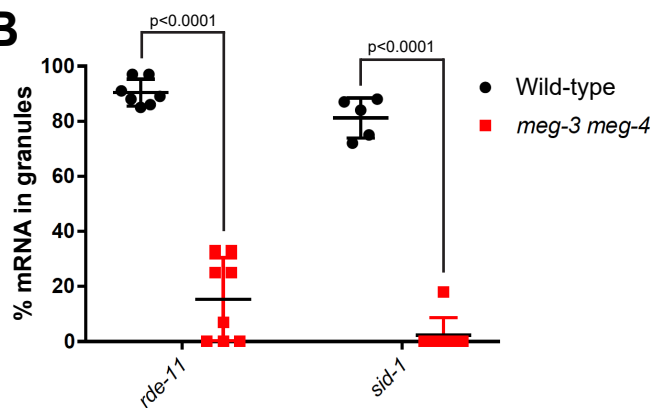

**C**

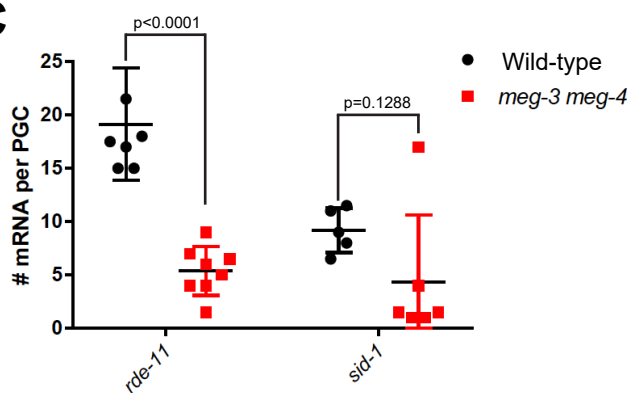

## Figure 7

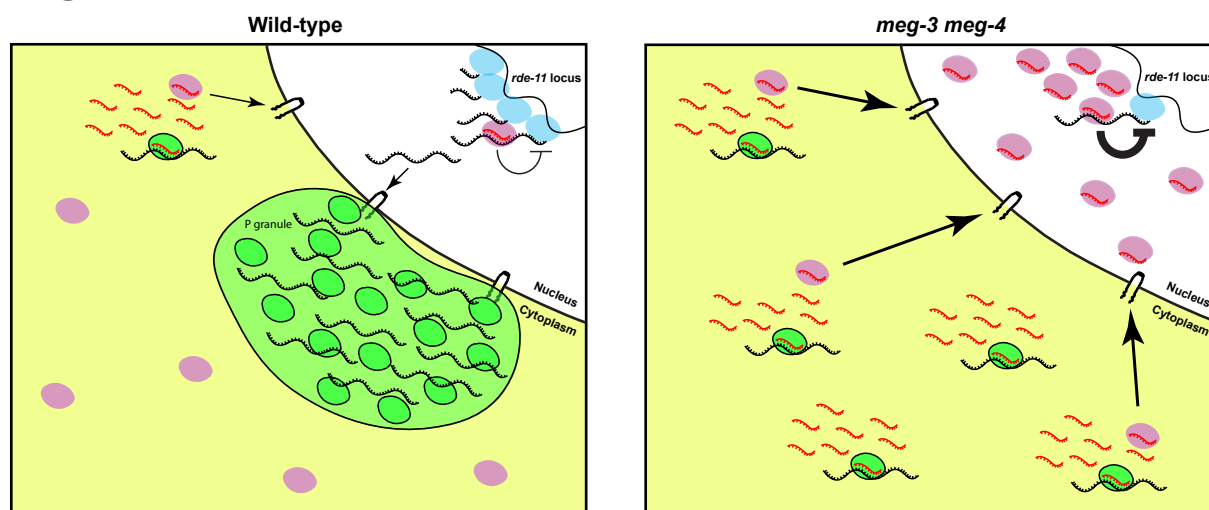



## Figure S1

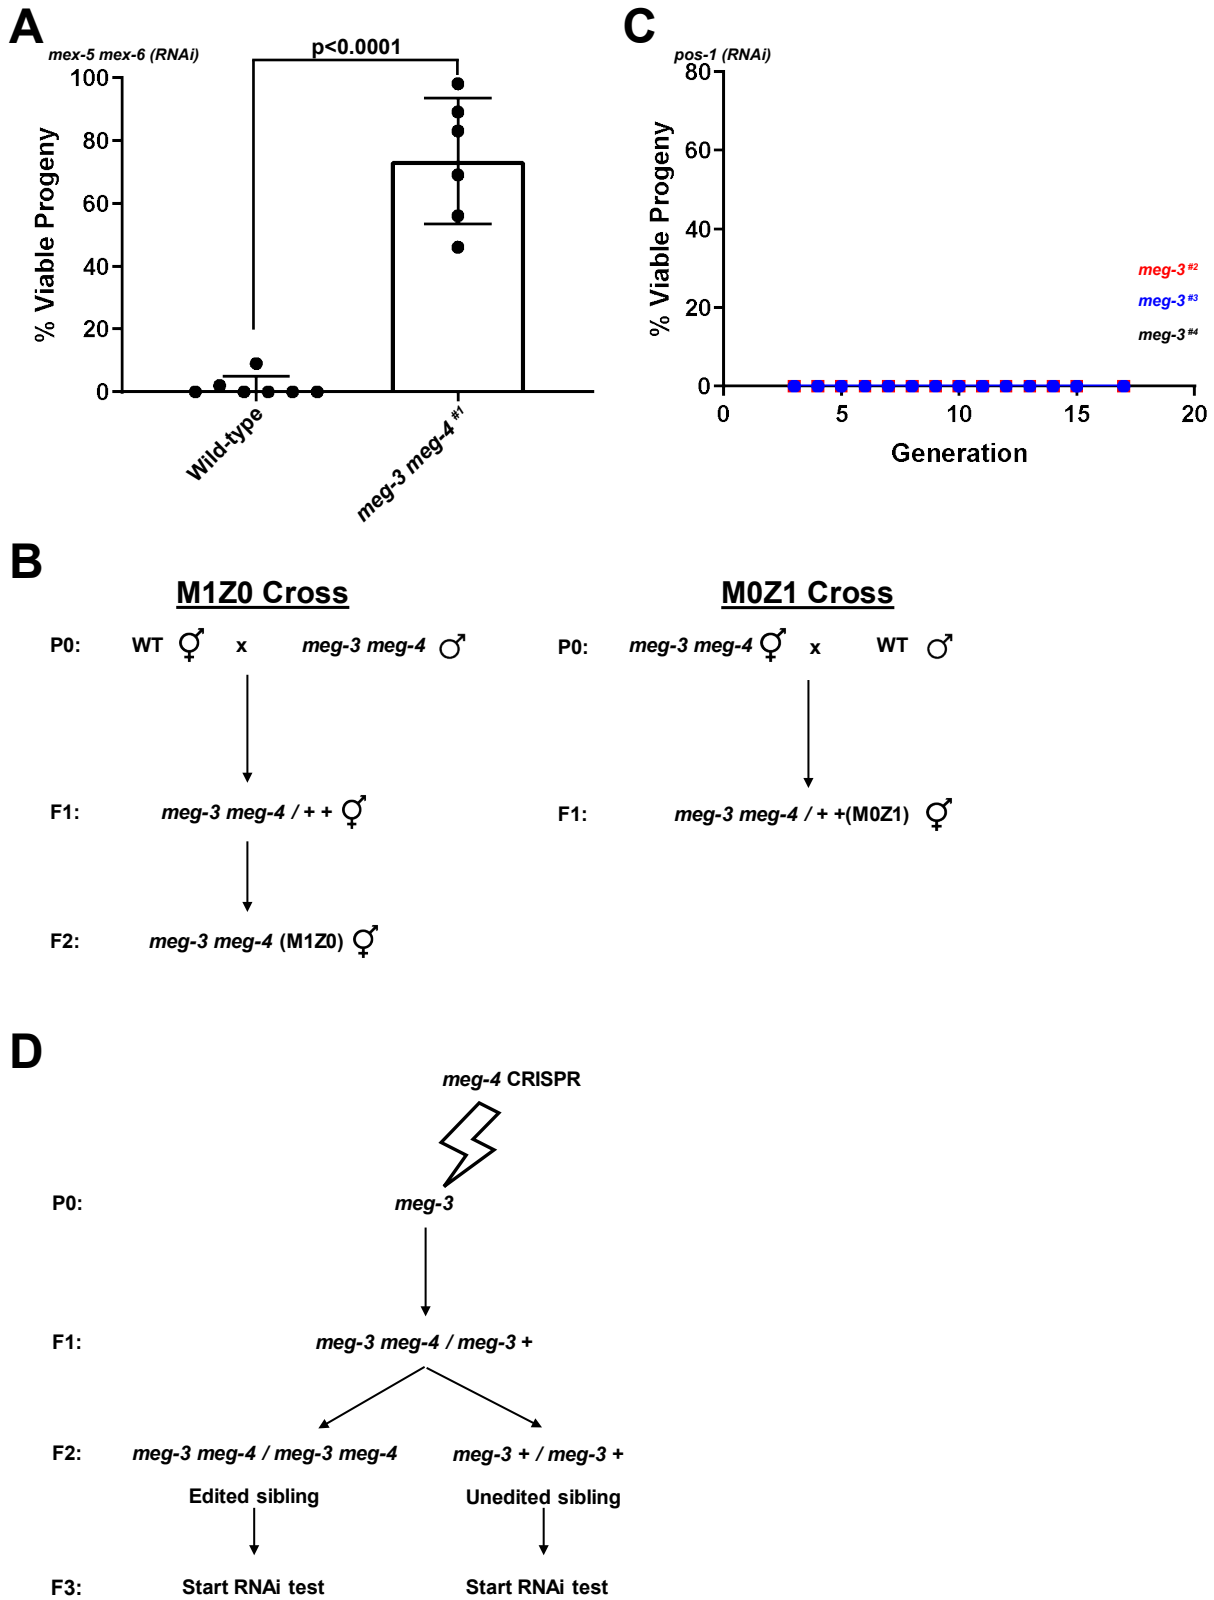

## Figure S2

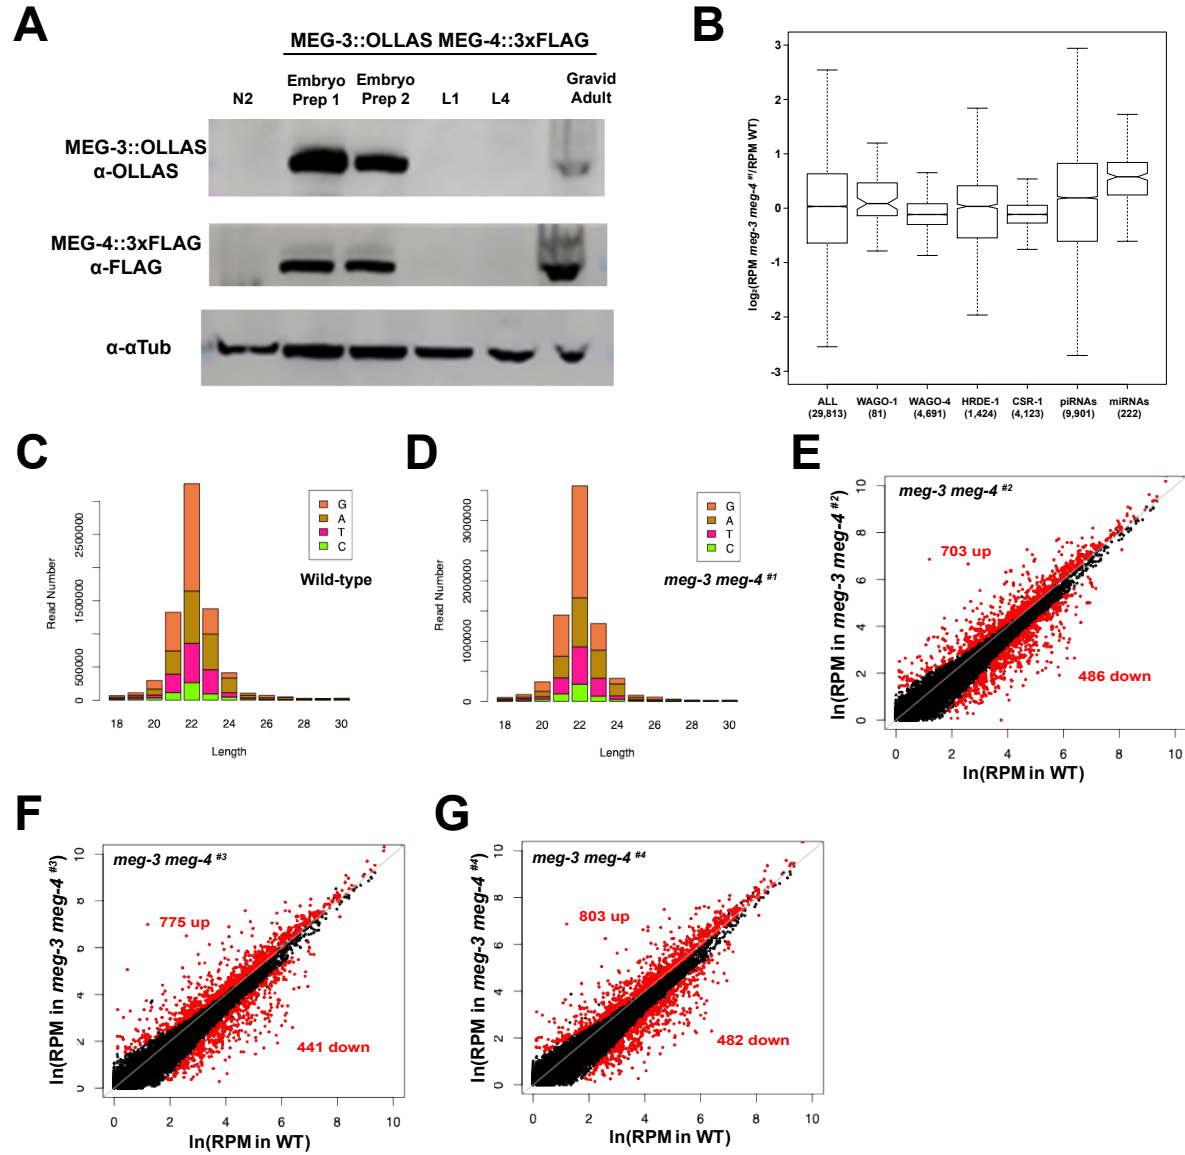

## Figure S3

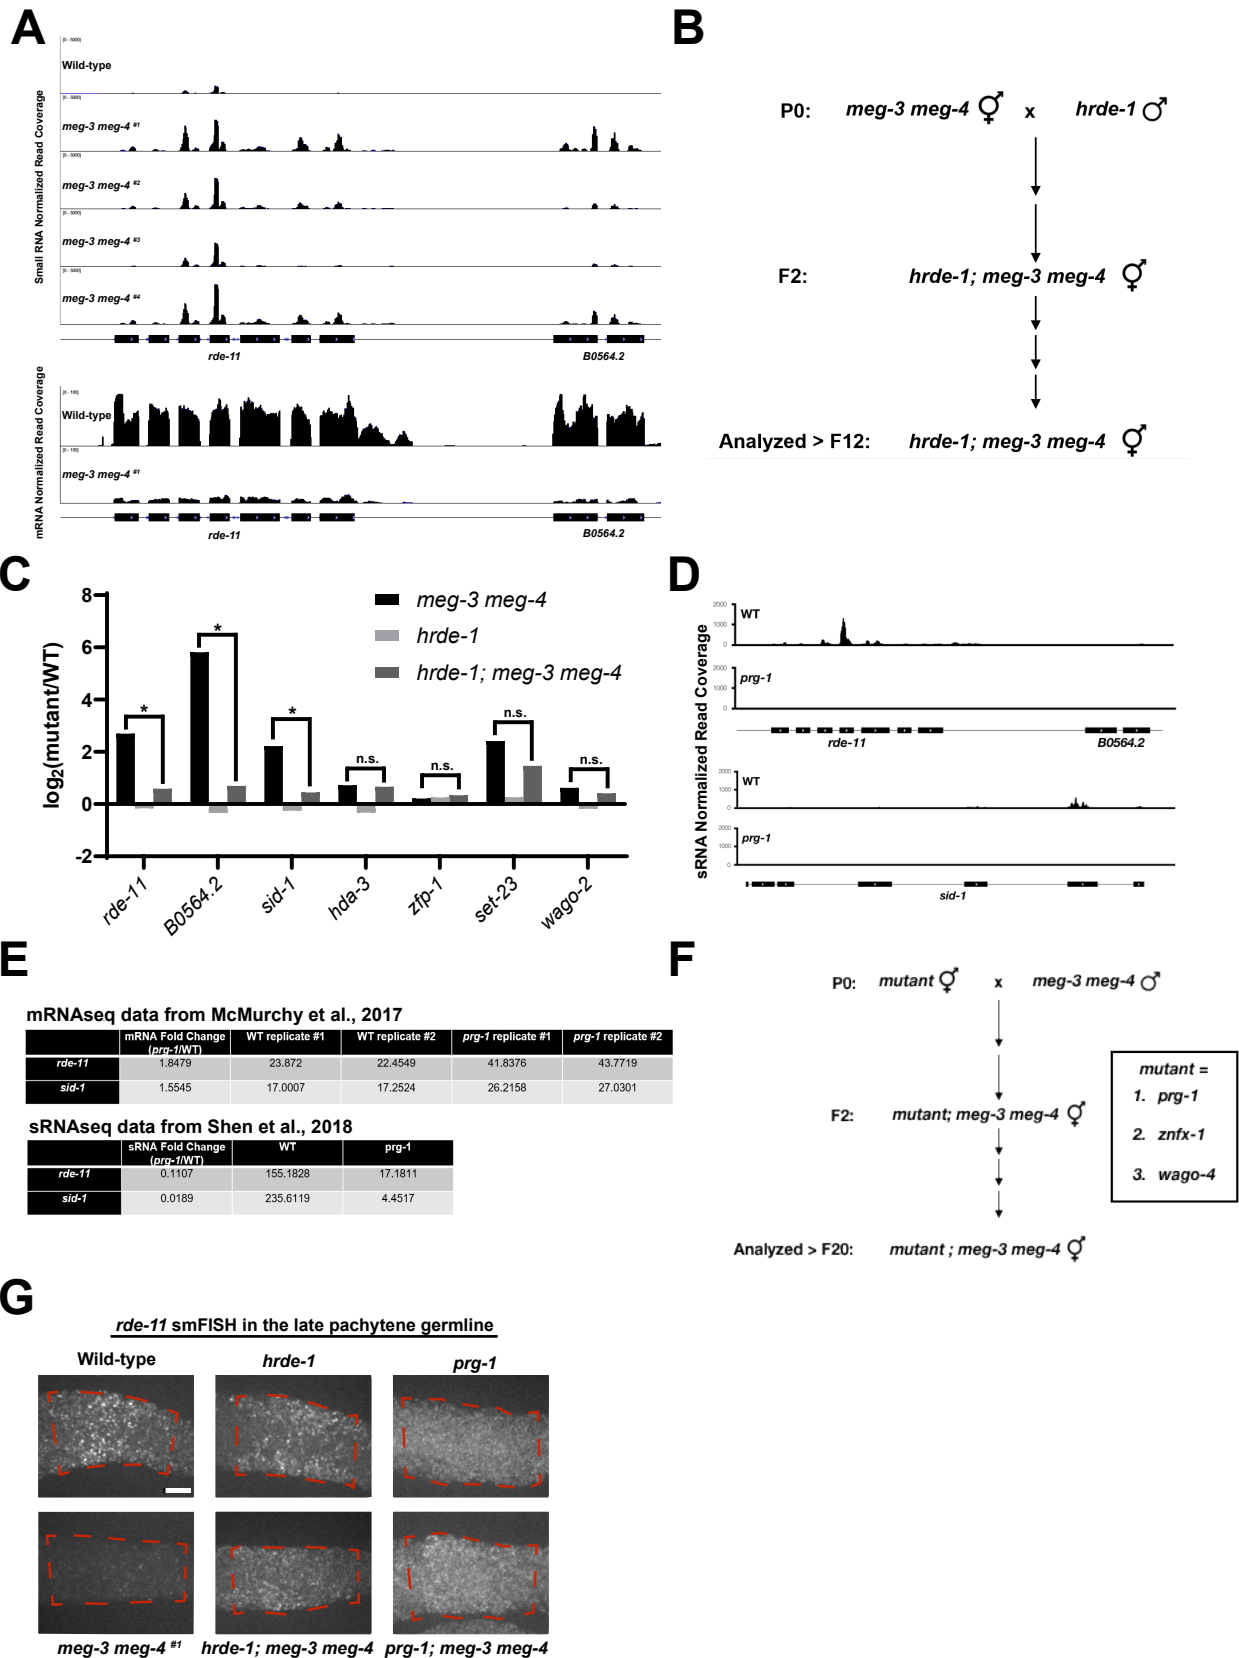

## Figure S4

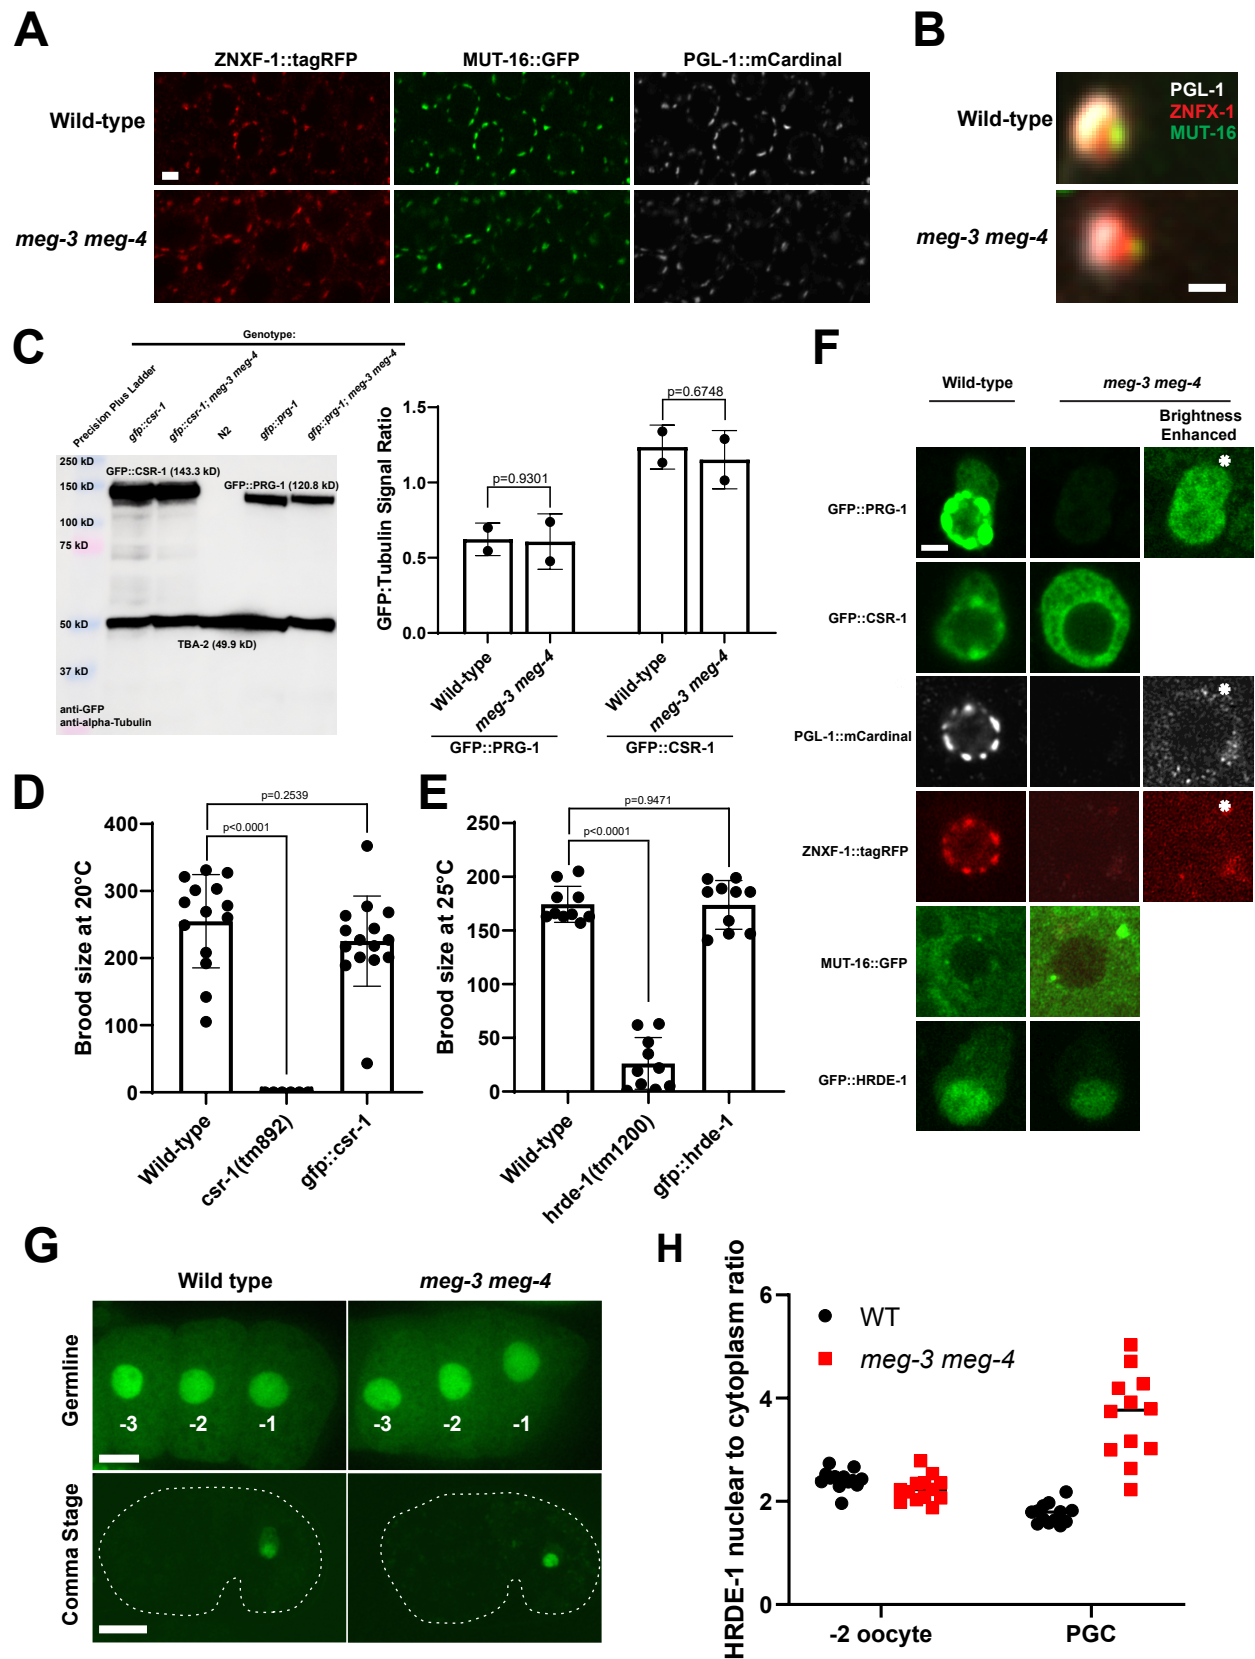

## Figure S5

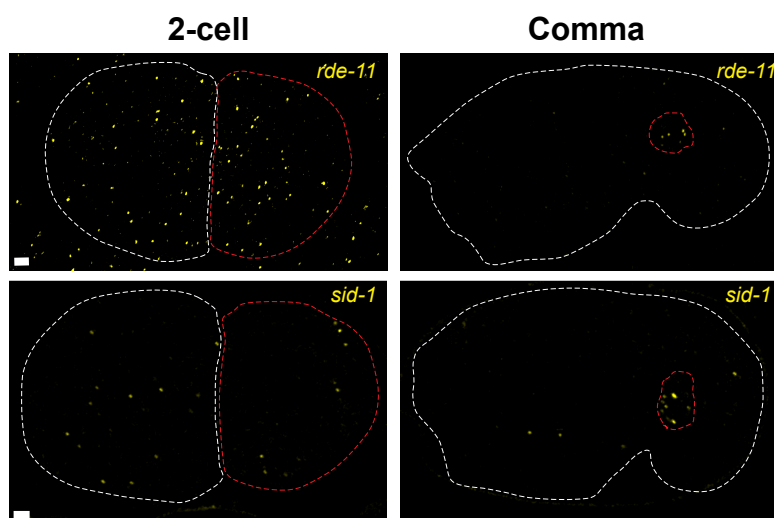

Source: https://www.biorxiv.org/content/10.1101/707562v1.full.pdf
